# Supplementary material
Source: PubMed Central journal article supplement (PMC5096915)

## SUPPLEMENTAL DATA

| STROMAL COMPARTMENT |                                    |       |              |           |
|---------------------|------------------------------------|-------|--------------|-----------|
| GO                  | Term                               | Count | Fold Enrich. | Benjamini |
| GO:0005578          | Proteinaceous extracellular matrix | 43    | 1.71         | 6.03E-04  |
| GO:0031012          | Extracellular matrix               | 49    | 1.69         | 2.31E-04  |
| GO:0044421          | Extracellular region part          | 118   | 1.58         | 1.75E-09  |
| GO:0005615          | Extracellular space                | 82    | 1.54         | 2.89E-05  |
| GO:0005576          | Extracellular region               | 200   | 1.53         | 4.87E-16  |
| TUMORAL COMPARTMENT |                                    |       |              |           |
| GO                  | Term                               | Count | Fold Enrich. | Benjamini |
| GO:0070013          | Intracellular organelle lumen      | 216   | 1.14         | 9.74E-04  |
| GO:0005829          | Cytosol                            | 270   | 1.13         | 1.18E-04  |

**Supplementary Table 1. Cellular location within stromal or tumoral compartment.** Table giving GO, term, proteins number, fold enrichment and *P* value (corrected using Benjamini and Hochberg method), depending cellular compartment using DAVID database.

| GO         | Term                                       | Count | Fold Enrich. | Benjamini |
|------------|--------------------------------------------|-------|--------------|-----------|
| GO:0030141 | Secretory granule                          | 24    | 8.14         | 1.03E-04  |
| GO:0016023 | Cytoplasmic membrane-bounded vesicle       | 51    | 6.07         | 2.16E-06  |
| GO:0005912 | Adherens junction                          | 21    | 4.00         | 1.34E-03  |
| GO:0031988 | Membrane-bounded vesicle                   | 53    | 3.73         | 1.41E-06  |
| GO:0043292 | Contractile fiber                          | 25    | 3.55         | 2.80E-05  |
| GO:0070161 | Anchoring junction                         | 24    | 3.35         | 3.76E-05  |
| GO:0005576 | Extracellular region                       | 153   | 3.15         | 1.45E-10  |
| GO:0042995 | Cell projection                            | 60    | 2.66         | 1.49E-06  |
| GO:0009986 | Cell surface                               | 35    | 2.6          | 8.99E-06  |
| GO:0032994 | Protein-lipid complex                      | 9     | 2.37         | 6.61E-03  |
| GO:0005856 | Cytoskeleton                               | 141   | 2.08         | 2.80E-10  |
| GO:0043228 | Non-membrane-bounded organelle             | 182   | 1.95         | 1.32E-13  |
| GO:0031012 | Extracellular matrix                       | 40    | 1.94         | 4.93E-06  |
| GO:0005577 | Fibrinogen complex                         | 5     | 1.82         | 9.82E-03  |
| GO:0060205 | Cytoplasmic membrane-bounded vesicle lumen | 15    | 1.97         | 4.12E-03  |
| GO:0031983 | Vesicle lumen                              | 15    | 1.6          | 3.98E-03  |

**Supplementary Table 2. Associated terms within stromal compartment.** Table giving GO, term, proteins number, fold enrichment and *P* value corrected using Benjamini test for each family.

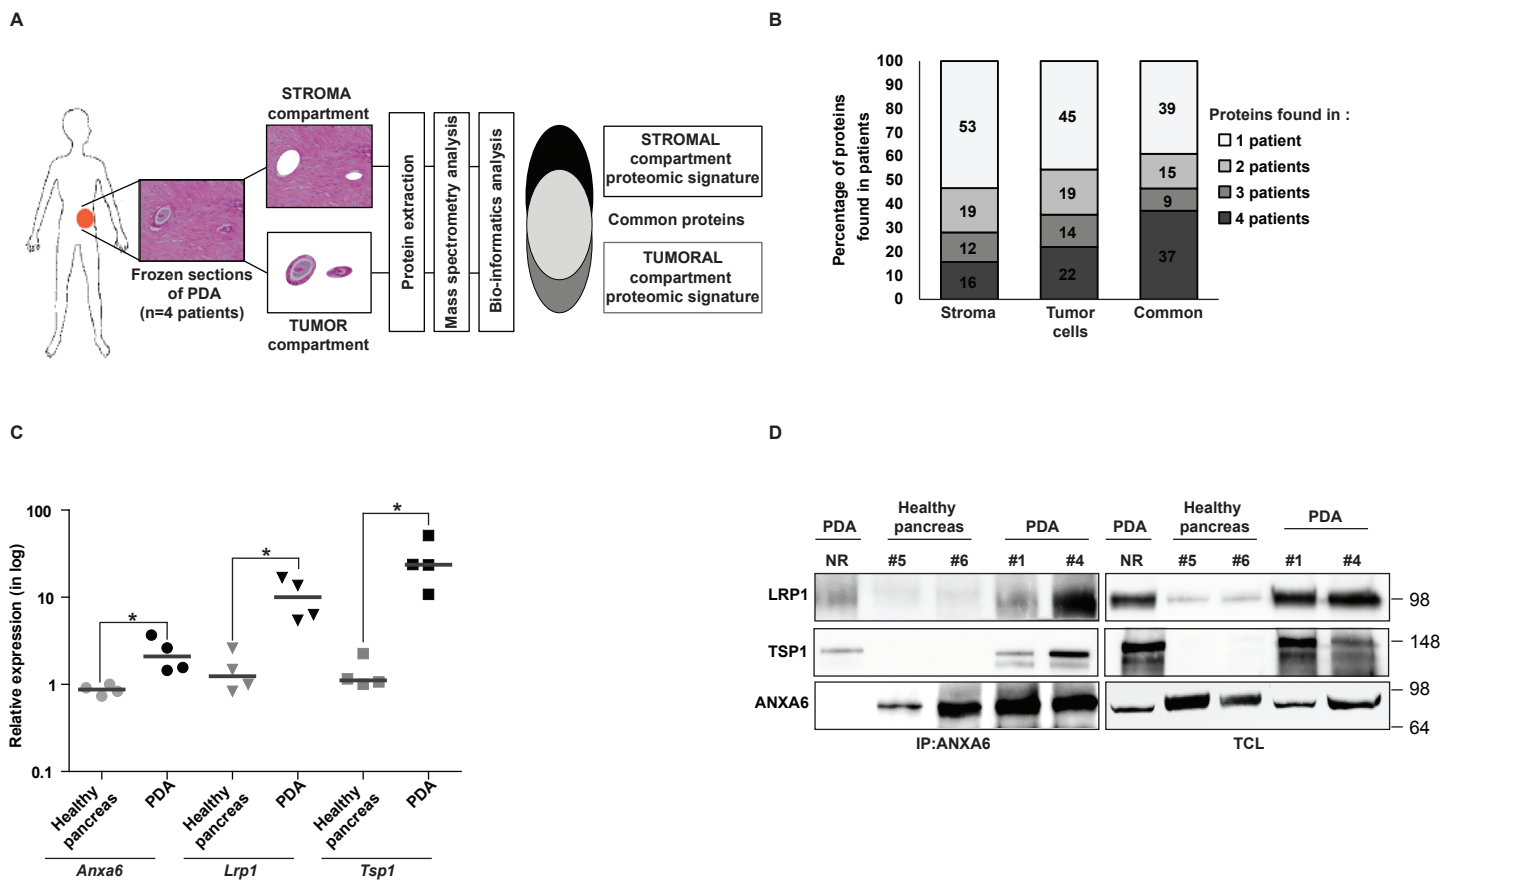

**Supplemental Figure 1. Human PDA microdissection followed by mass Spectrometry coupled to bio-informatics analyses identified a new complex in stroma PDA.** (A) Graphical representation of technical procedure used to obtain proteomic signature of each compartment (n=4). (B) Percentage of proteins, in both compartments, present in 1, 2, 3 or 4 patients. (C) Relative expression of Anxa6, Lrp1 and Tsp1 mRNA in mice healthy pancreas (n=4, #7 – # 10) and PDA (n=4, #5 – # 8). Data are expressed as fold increase compared with one healthy pancreas. 36B4 mRNA level is used for normalization. Data represent median  $\pm$  interquartile range from three independent experiments. NS: Non Significant, \* $P < 0.05$ , Mann–Whitney U-test. (D) Co-immunoprecipitation of ANXA6 with LRP1 and TSP1 in protein extracts from mouse healthy pancreas and PDA. Total cell lysate and non-relevant (NR) antibody were used as loading and negative control respectively. Data are representative of three independent experiments.

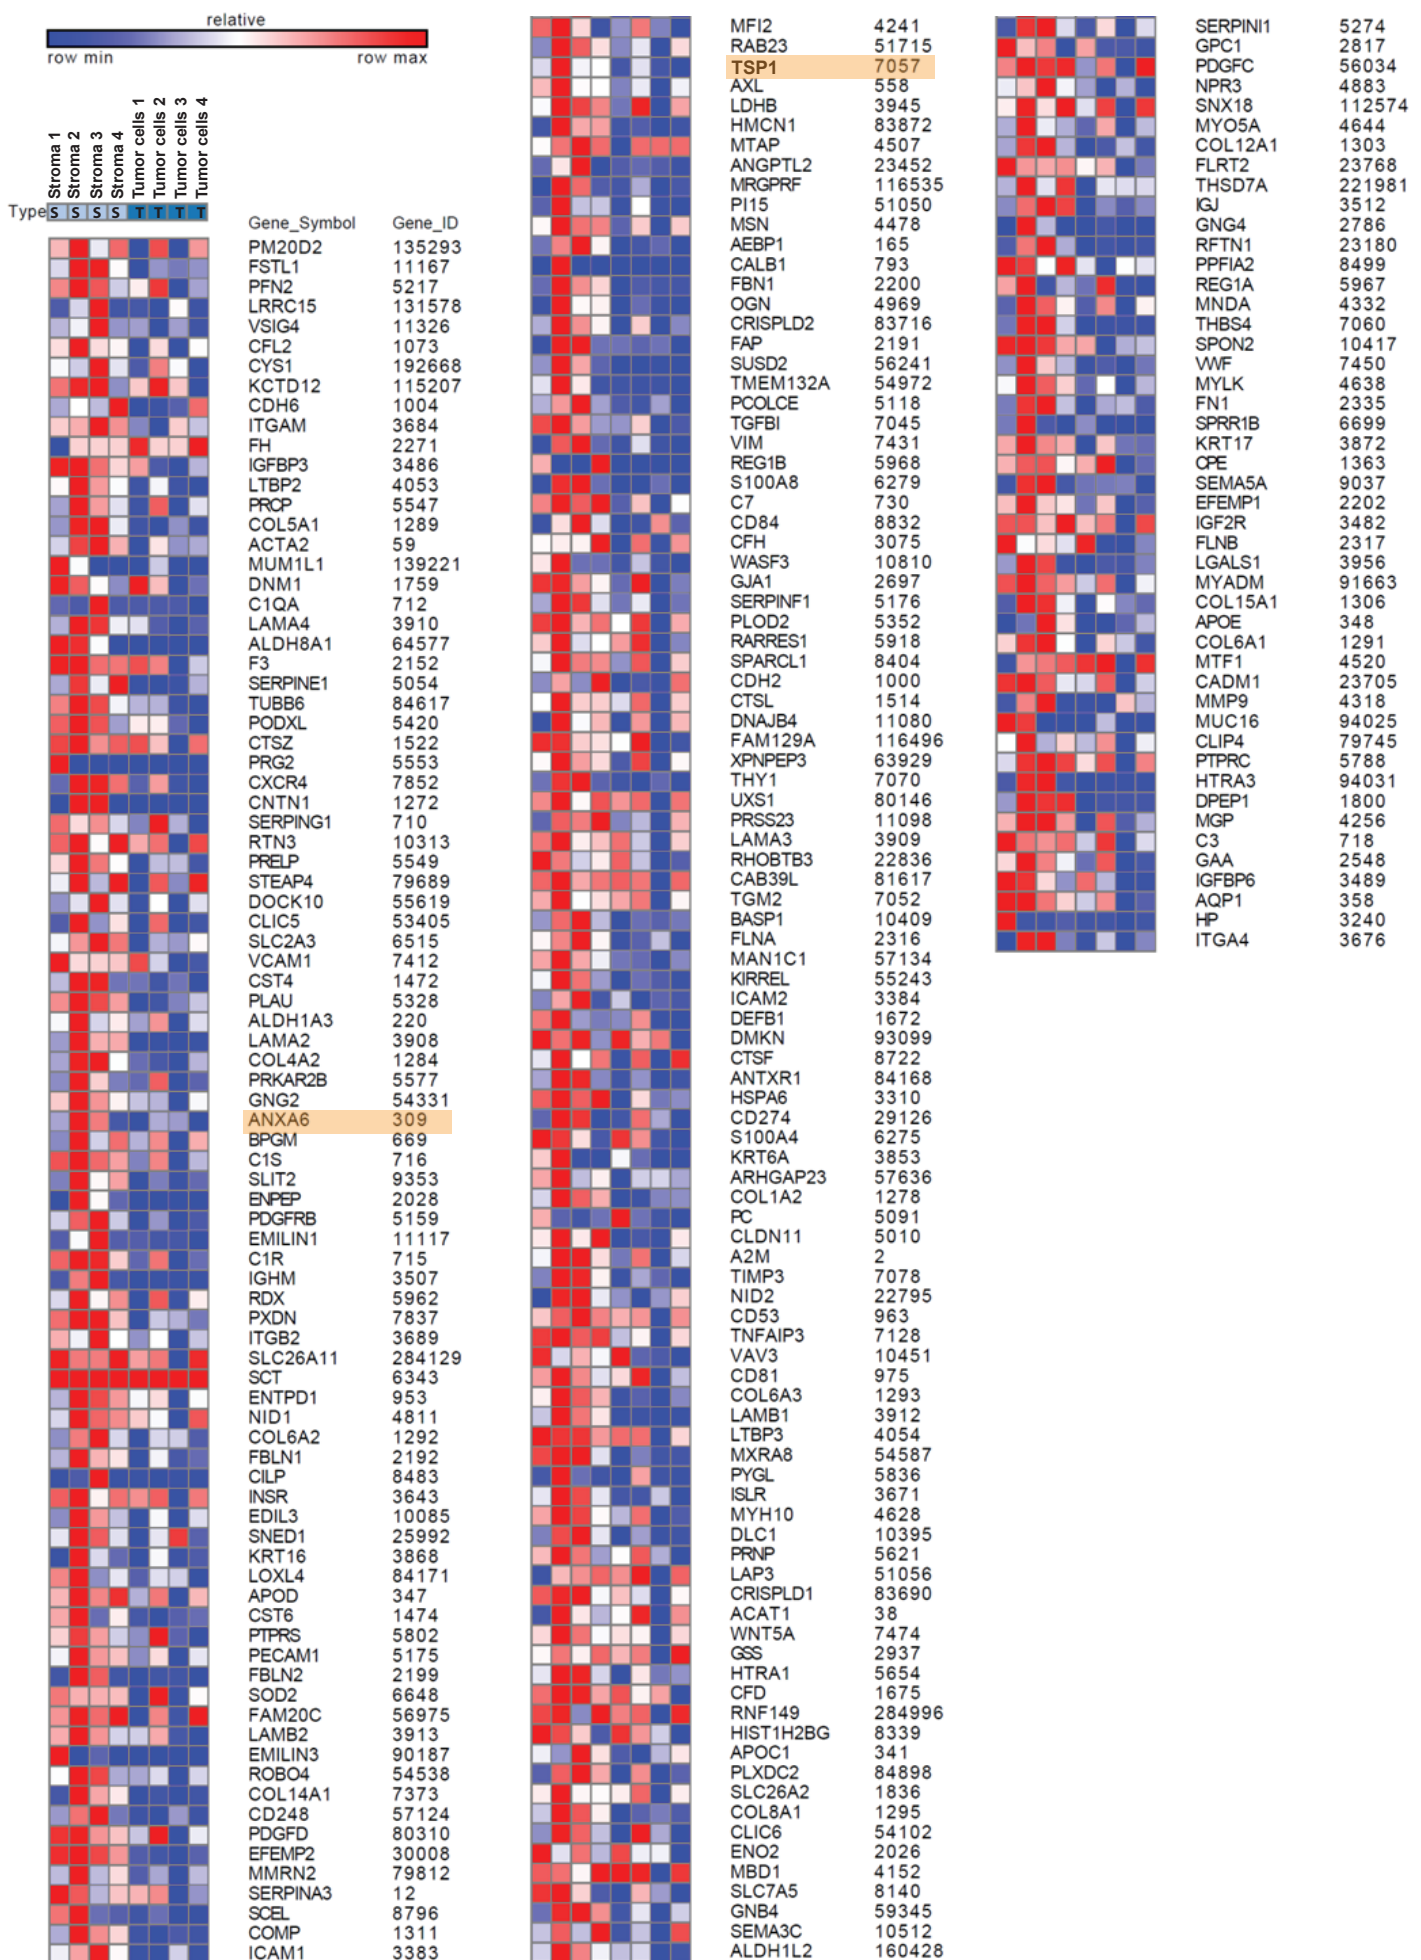

**Supplemental Figure 2. Determination of stromal transcriptomic signature and characterization of the extracellular vesicles exosome family.** These data are obtained from previous study (12), after laser microdissection from human PDA and transcriptomic analysis. Heat map highlighting transcripts marked as "Extracellular vesicular exosome" found to be significantly over-expressed in stroma compared to tumor tissue using gene ontology (GO) enrichment. It was measured by a hypergeometric distribution and Bonferroni-corrected ( $P=2.34 \times 10^{-16}$ ). Each column is related to a single Affymetrix chip hybridized using the cDNA synthesized from individual stroma (S) or tumor (T). Red color represents higher gene expression values and blue represents lower expression. Anxa6 and Tsp1 are highlighted in orange.



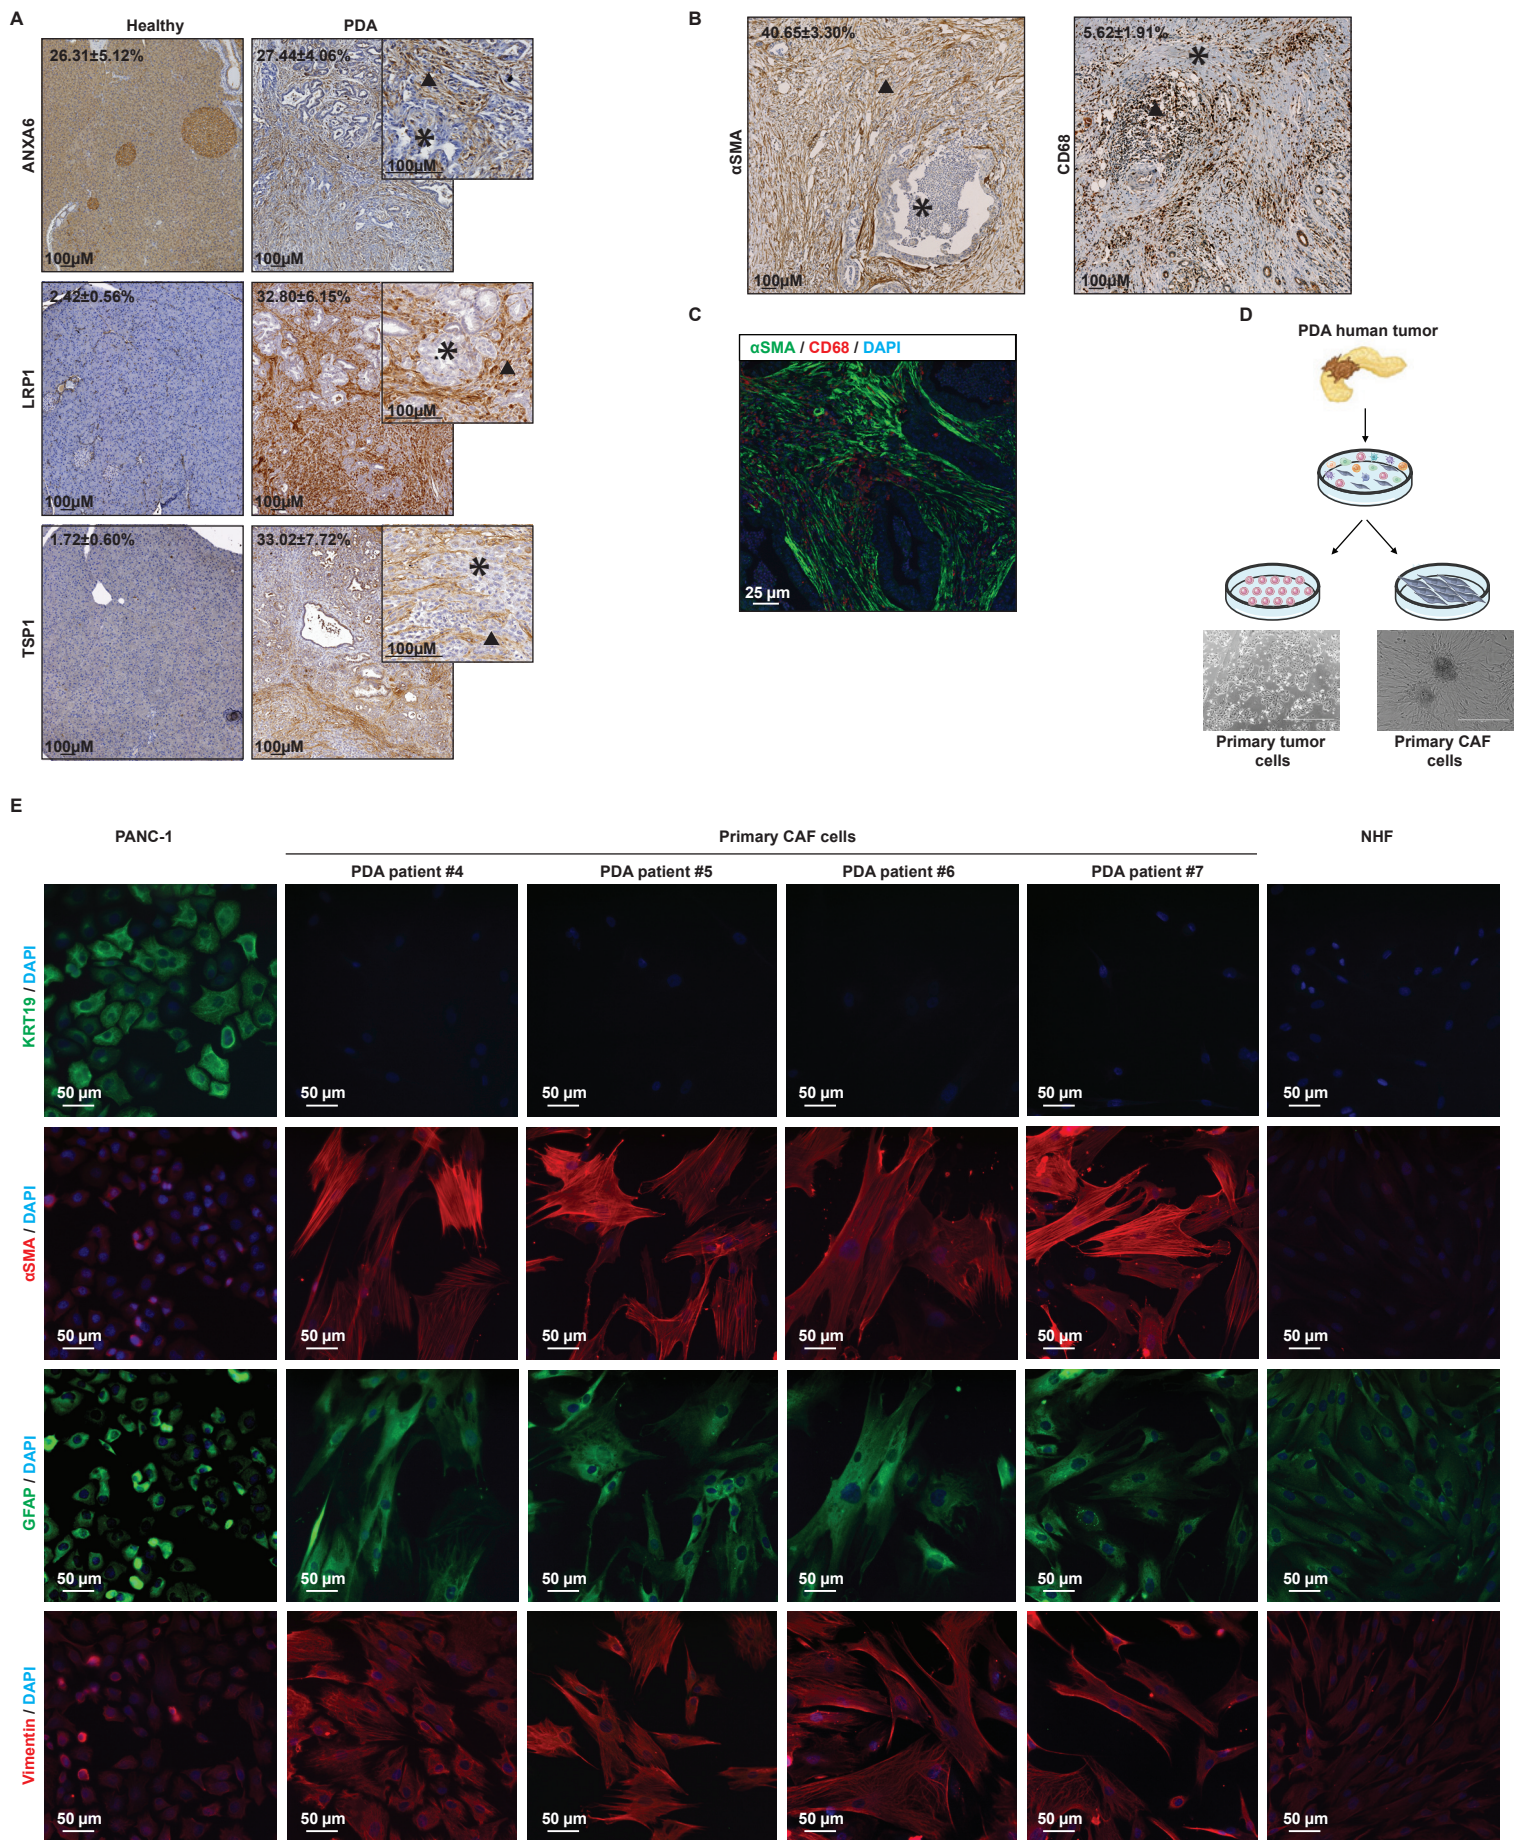

**Supplemental Figure 3. Microenvironment cells, and mainly CAFs, drive ANXA6, LRP1 and TSP1 expression in PDA.** (A) Representative micrographs (scale bars : 100μm) and quantifications of ANXA6, LRP1 or TSP1 staining in mouse healthy pancreas or PDA (median value ± interquartile range, n=3). (B) Representative micrographs (scale bars : 100μm) and quantifications of αSMA and CD68 staining in human PDA (median value ± interquartile range, n=3). (C) Representative micrograph (scale bars : 25μm) of dual-immunofluorescence using αSMA staining with CD68 in human PDA, n=3. (D) Graphical representation of primary tumor cells or primary CAF cells preparation from freshly resected human PDA samples. (E) Representative micrographs (scale bars : 50μm) of immunofluorescence using KRT19, αSMA, GFAP and vimentin staining in PANC-1, Primary CAFs cells (n=4) and NHF. Data are representative of three independent experiments.



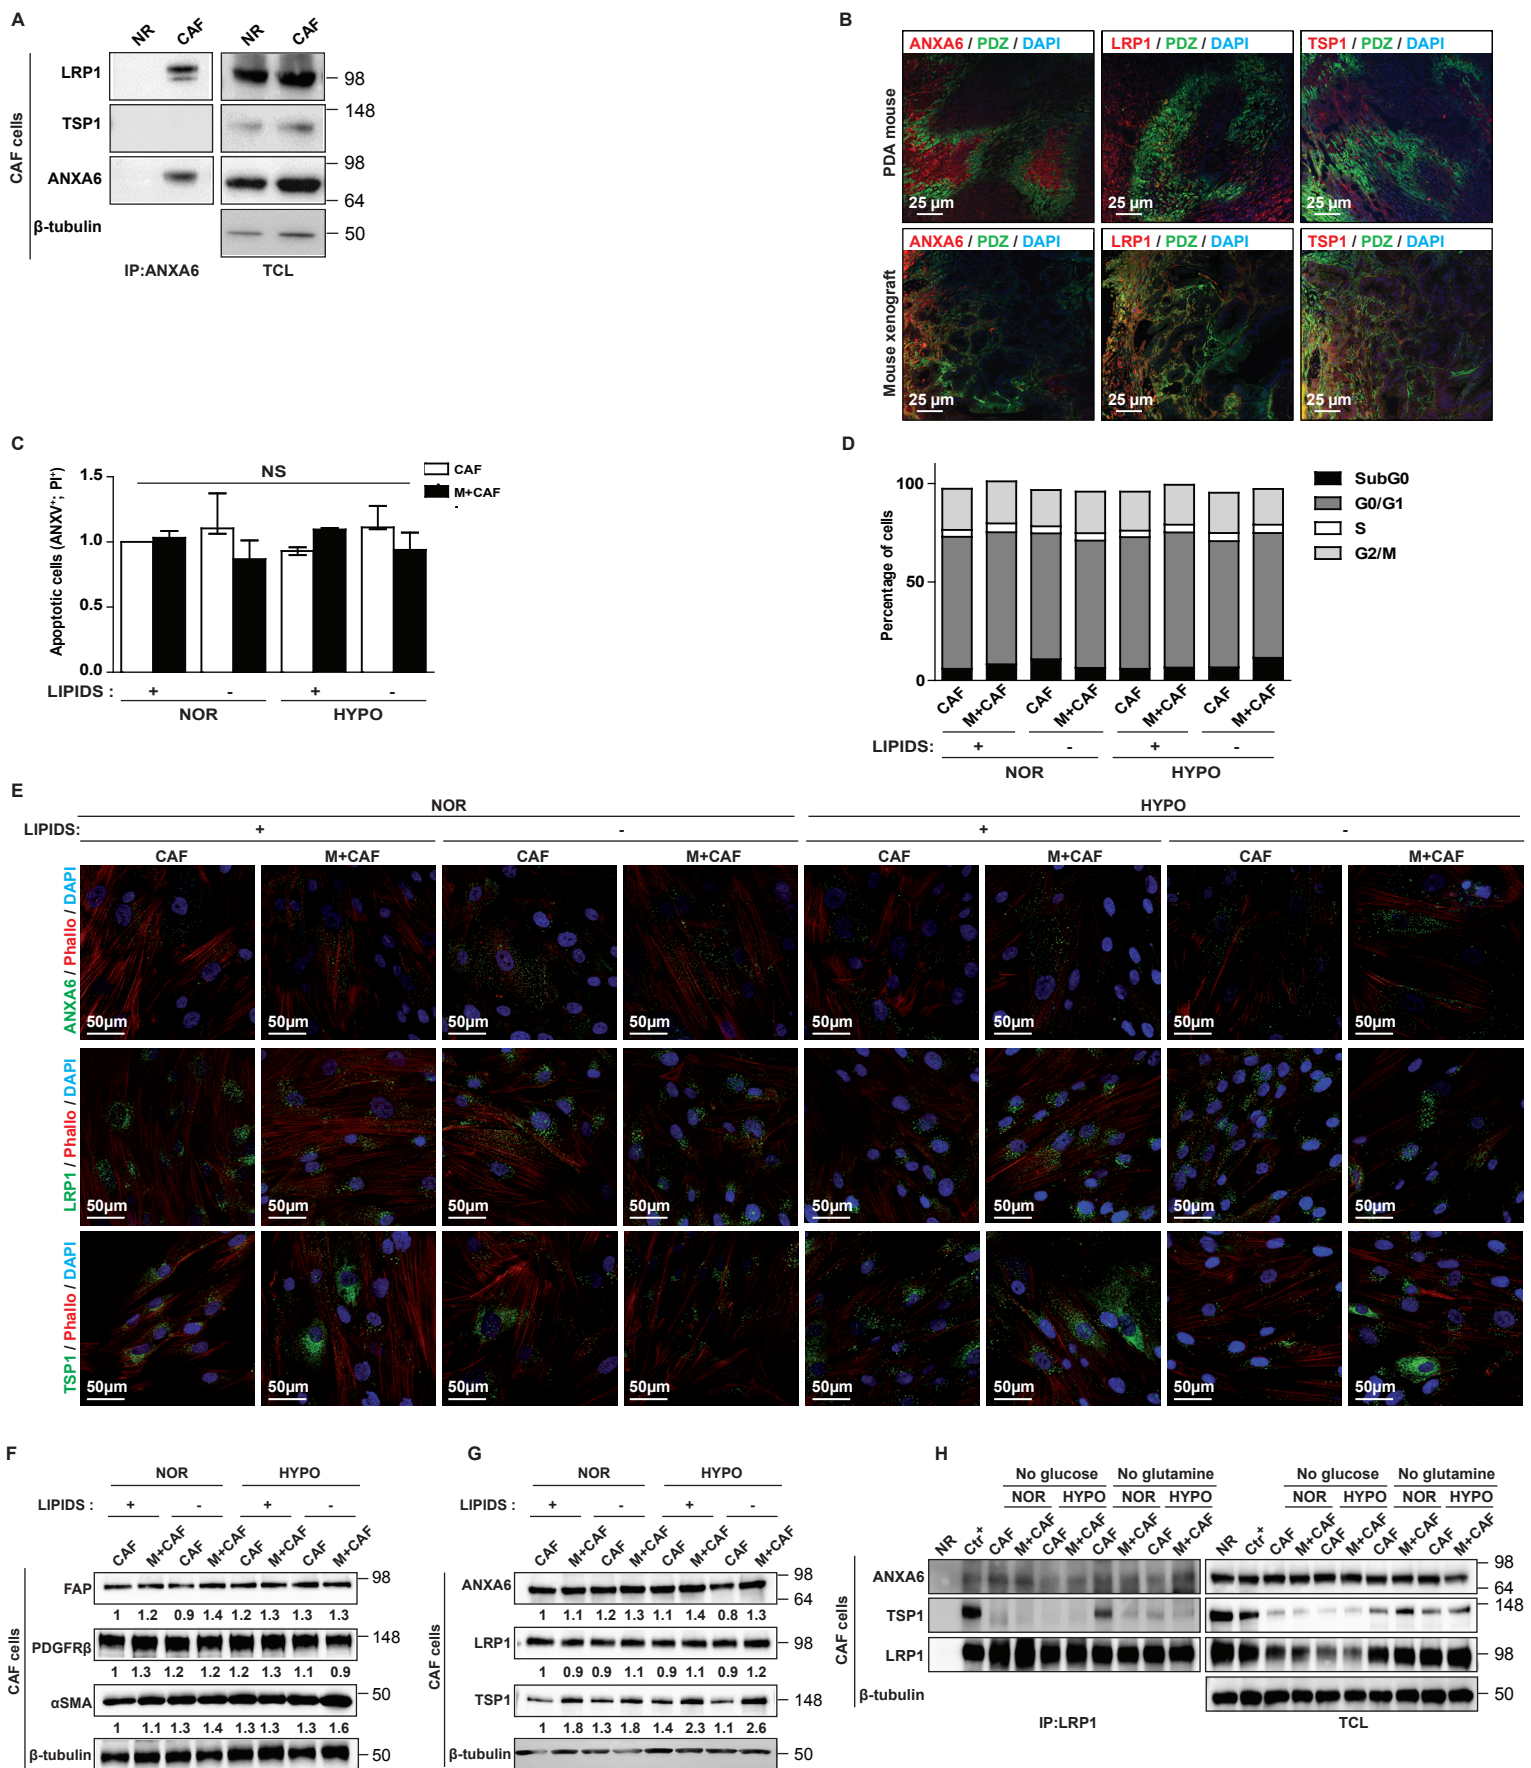

**Supplemental Figure 4. CAFs drive ANXA6, LRP1 and TSP1 complex in vitro.** (A) Western blot of the indicated proteins following endogenous co-immunoprecipitation with anti-ANXA6 antibody in CAFs lysates. Total cell lysate and non-relevant (NR) antibody were used as loading and negative control respectively. Data are representative of three independent experiments. (B) Representative micrographs (scale bars : 25μm) of dual-immunofluorescence using ANXA6, LRP1 or TSP1 staining with pimonidazol (PDZ; hypoxic marker) in mouse PDA or mouse xenograft. (C) Cell apoptosis measurement of CAF. Data are expressed as fold increase compared with CAF in normoxia and lipids presence (median ± interquartile range, n=3). NS : non significant, two-way ANOVA. (D) Cell cycle measurement of CAF (median ± interquartile range, n=3). (E) Representative micrographs (scale bars : 50μm) of dual-immunofluorescence using ANXA6, LRP1 or TSP1 staining with phalloidine. (F and G) Western blot of the indicated proteins in lysates established from CAFs cultured under various conditions. Quantifications are expressed as fold increase compared with CAFs cultured under normoxia in presence of lipids. (H) Western blot of the indicated proteins following endogenous co-immunoprecipitation with non-relevant antibody (NR) as negative control or anti-LRP1 antibody in protein lysates from CAFs cultured under various conditions. (TCL : Total cell lysates). Ctr+ represents CAF in physiopathologic cultures. Data are representative of three independent experiments.

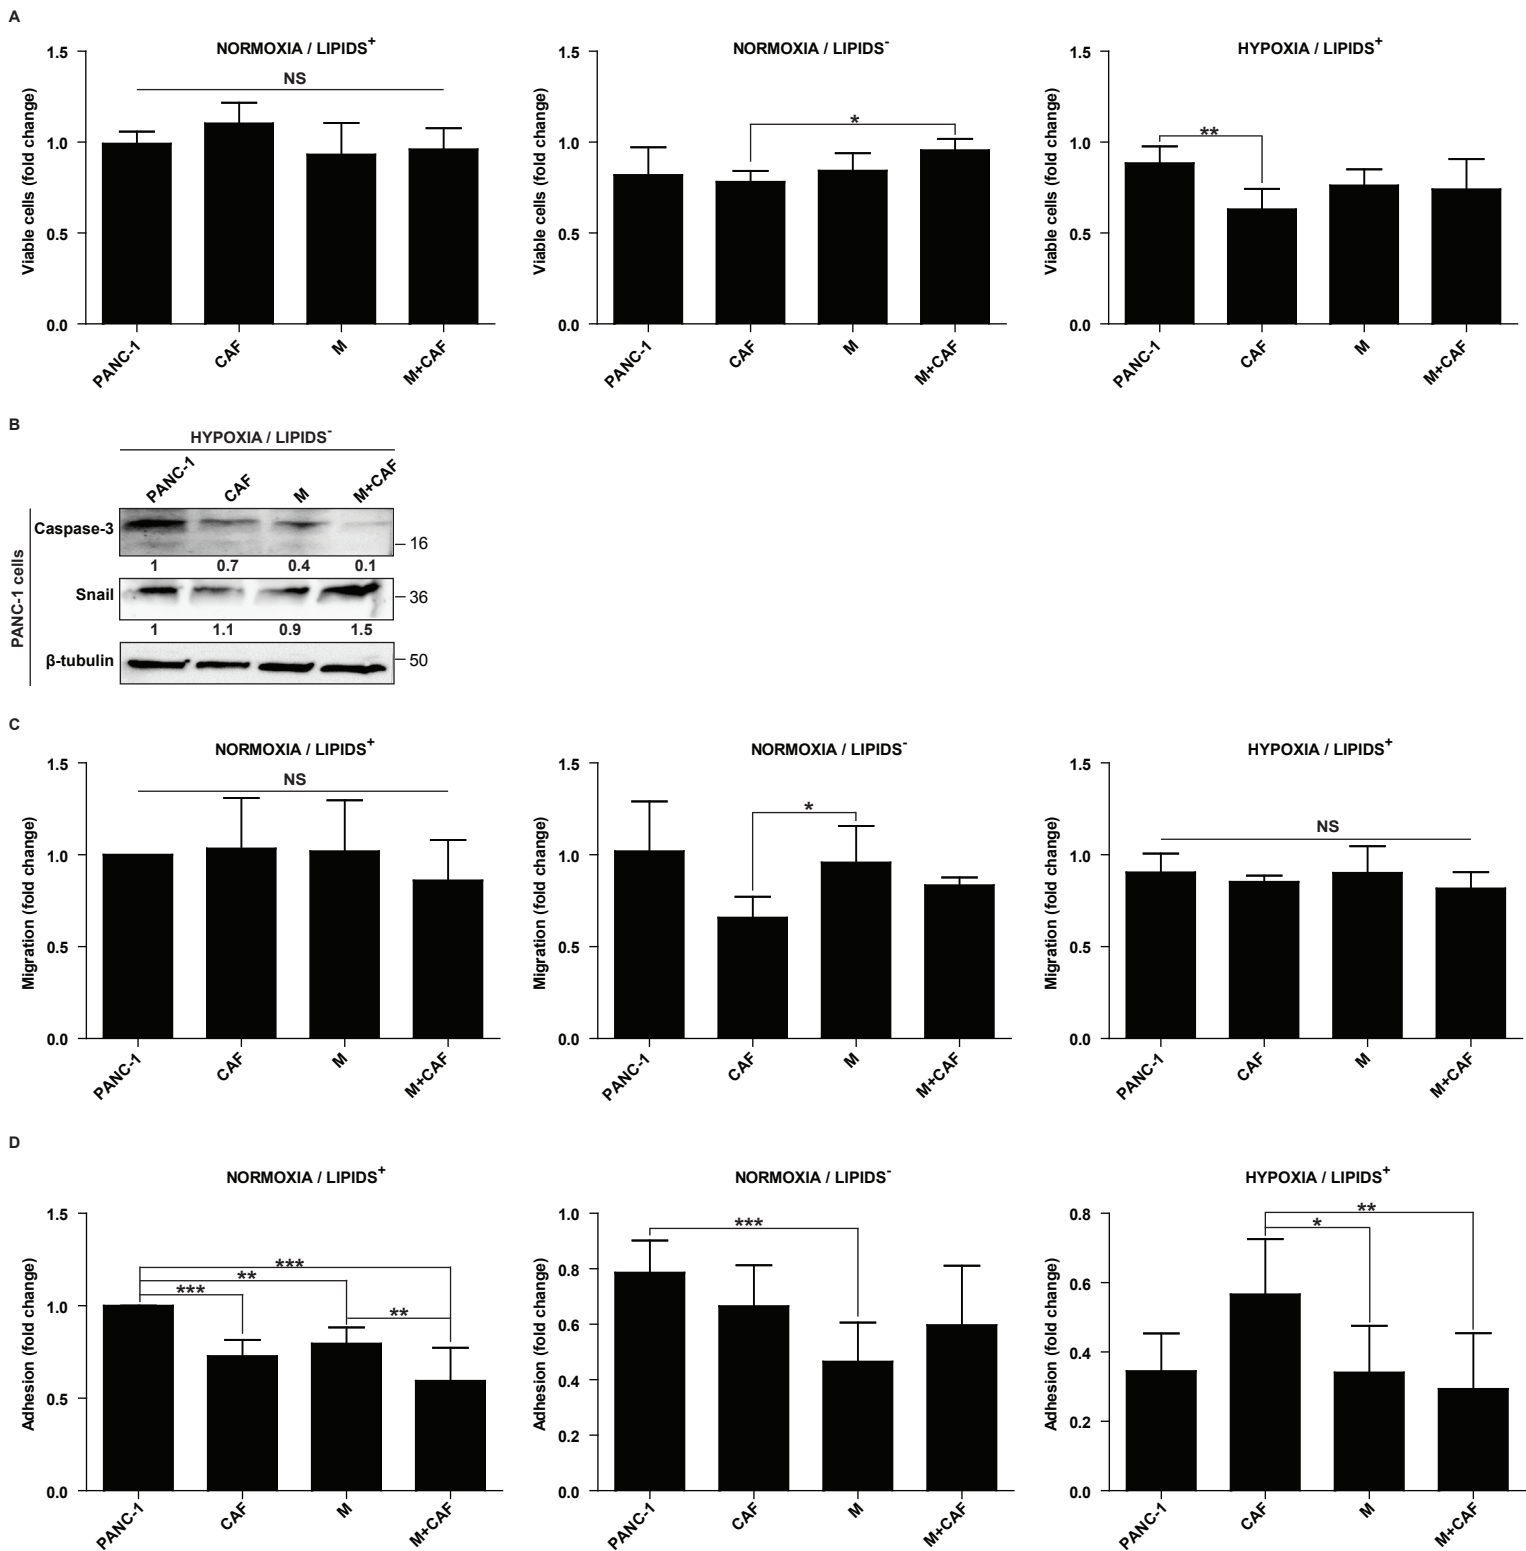

**Supplemental Figure 5. Impact of stromal cell cultures on tumor cell abilities.** (A) PANC-1 cells viability measurement (median  $\pm$  interquartile range,  $n=3$ ). NS : Non significant, \*  $P < 0.05$ , \*\*  $P < 0.005$ , Two-way ANOVA. (B) Western blot analysis of Caspase-3 and Snail in PANC-1 from co-culture with CAF in physiopathologic conditions. Quantifications are expressed as fold increase compared with PANC-1 alone. Data are representative of three independent experiments. (C) PANC-1 migration ability measurement (median  $\pm$  interquartile range,  $n=3$ ). NS : Non significant, \*  $P < 0.05$ , Two-way ANOVA. (D) PANC-1 adhesion ability measurement (median  $\pm$  interquartile range,  $n=3$ ). \*  $P < 0.05$ , \*\*  $P < 0.005$ , \*\*\*  $P < 0.001$ , Two-way ANOVA. A, C and D, data are expressed as fold increase compared with PANC-1 alone in Normoxia/Lipids+.

A

HYPOXIA / LIPIDS<sup>-</sup>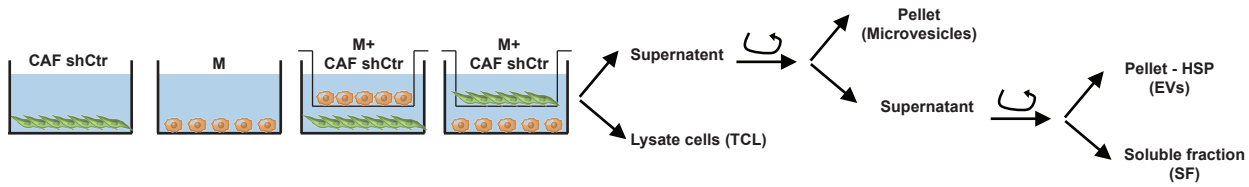

B

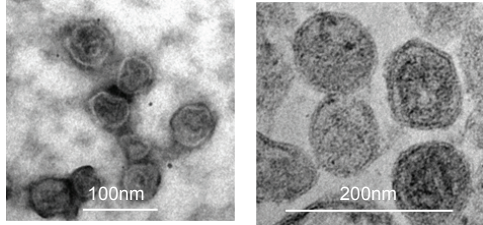

Mean size = 45.8 nm, n = 24 images    Median size = 46.4 nm, n = 3700 vesicles

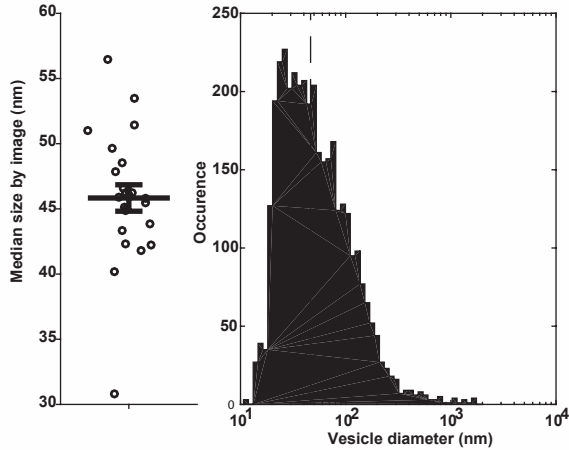

C

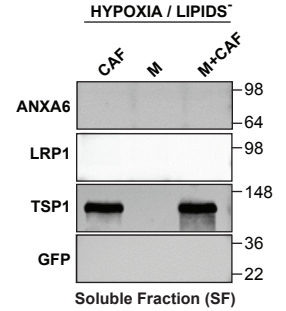

D

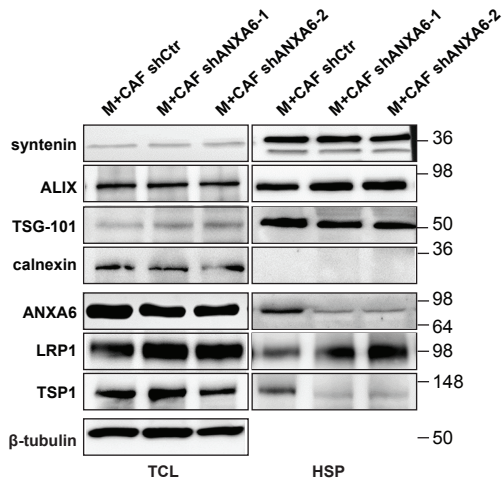

E

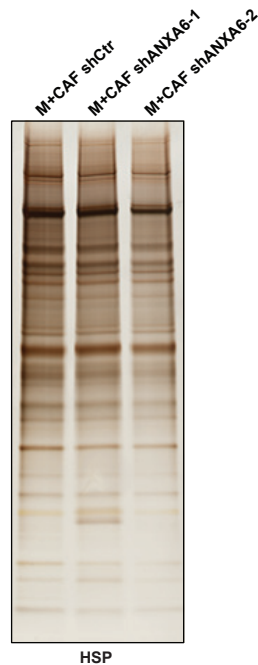

F

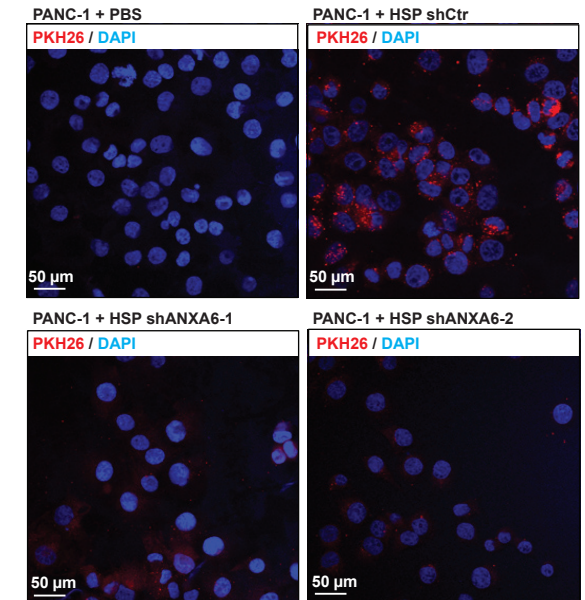

**Supplemental Figure 6. EVs quantification and uptake by tumor cells.** (A) Graphical representation of culture protocol to obtain HSP containing EVs or soluble fraction (SF). CAF are infected with GFP-containing shRNA. (B) Microscopy electronic pictures and EVs distribution obtained from cells supernatant. Left picture represents EVs after negative staining (scale bars : 100nm) and right picture represents EVs after morphologic protocol (scale bars : 200 nm). The mean or median diameter was assessed from 3700 vesicles, measured over 24 images. (C) Western blot of the indicated proteins in soluble fraction. Data are representative of three independent experiments. (D) Western blot of the indicated proteins in total cell lysate (TCL, left panel) or HSP extractions (right panel) established from CAFs infected with shCtrl or shANXA6s cultured under physiopathologic conditions.  $\beta$ -tubulin served as loading control. Data are representative of three independent experiments. (E) Silver-stained protein bands coloration in polyacrylamide gels of HSP. Data are representative of three independent experiments. (F) Representative micrographs (scale bars : 50 $\mu$ m) of immunofluorescence using PKH26 staining in PANC-1. Data are representative of three independent experiments.



A

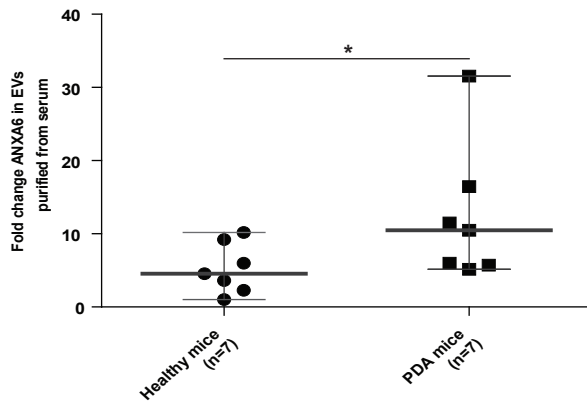

B

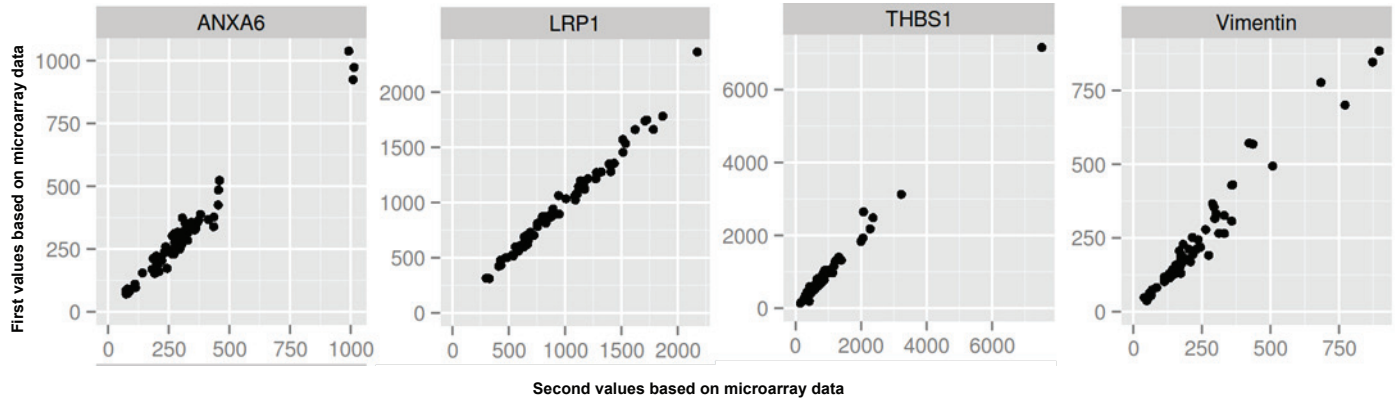

C

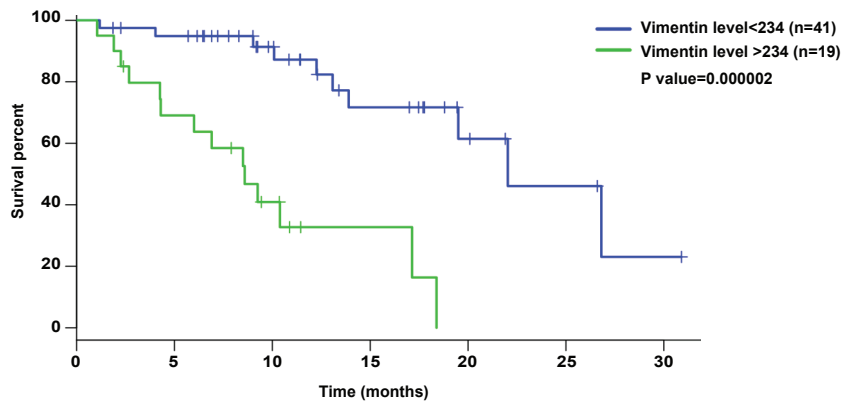

**Supplemental Figure 7. (A)** Quantification of ANXA6<sup>+</sup>-EVs purified from healthy mice (n=7) or PDA bearing mice (n=7) sera (median  $\pm$  interquartile range). \*  $P < 0.05$ , Mann–Whitney U-test. **(B)** Reproducibility of two chips using for transcriptomic analysis on patients derived xenografts, for Anxa6, Lrp1, Thbs1 and Vimentin. **(C)** Kaplan–Meier survival curve using transcriptomic analysis on patients derived xenografts, divided into high (>234) and low (<234) Vimentin expression groups based on the log-rank statistic test (n = 41 and n = 19, respectively).  $P=0.000002$ .

**Full unedited gel for Figure 1D**

**ANXA6**

**LRP1**

**TSP1**

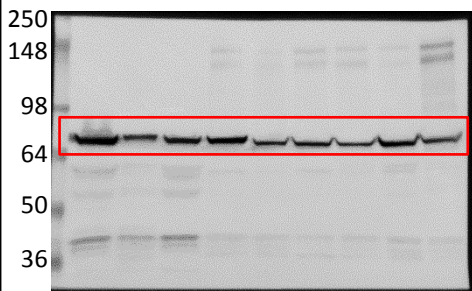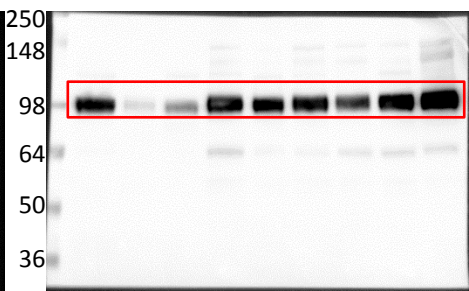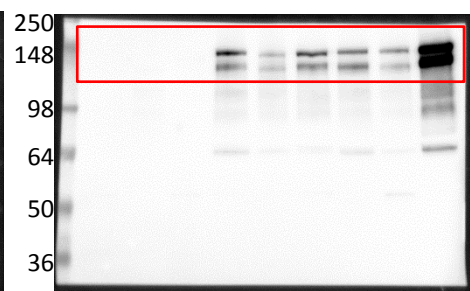

**Full unedited gel for Figure 1E**

**TSP1**

**ANXA6**

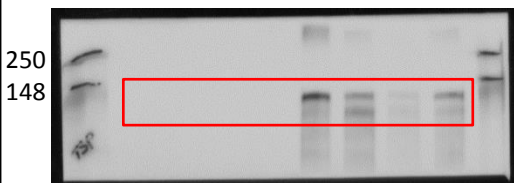

**LRP1**

Membrane cut at 98kDa – shared with LRP1 and ANXA6

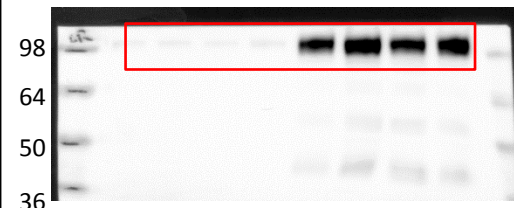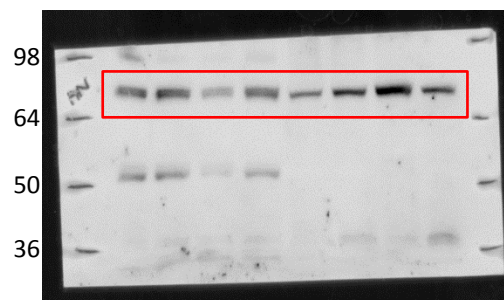

**Full unedited gel for Figure 1F**

**IP - LRP1, WB LRP1**

**TCL - LRP1**

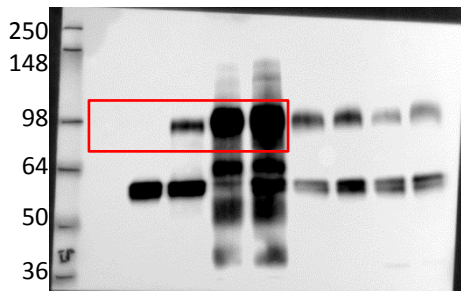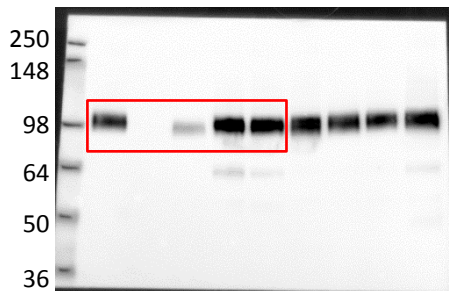

**IP - LRP1, WB TSP1**

**TCL - TSP1**

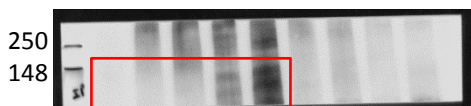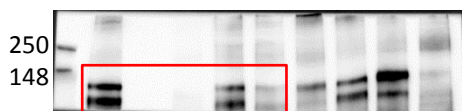

**IP - LRP1, WB ANXA6**

**TCL - ANXA6**

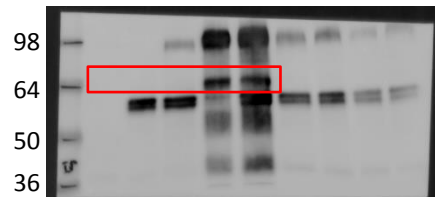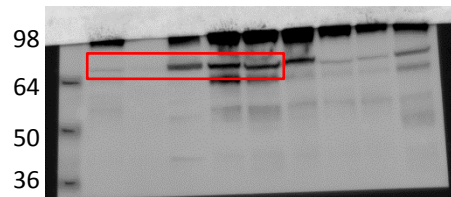

Membrane cut at 98kDa – shared with ANXA6

**Full unedited gel for Figure 1G**

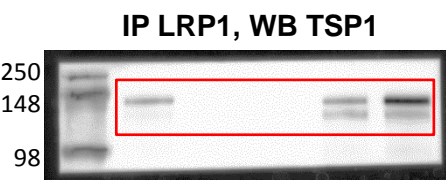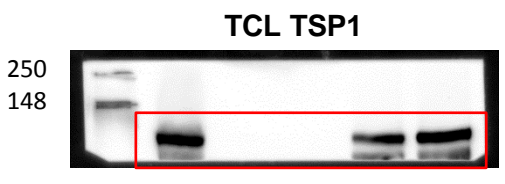

Membrane cut at 98kDa – shared with LRP1 and ANXA6

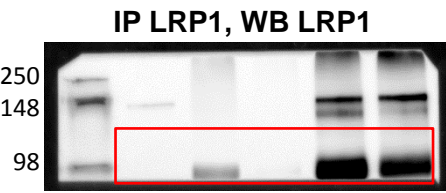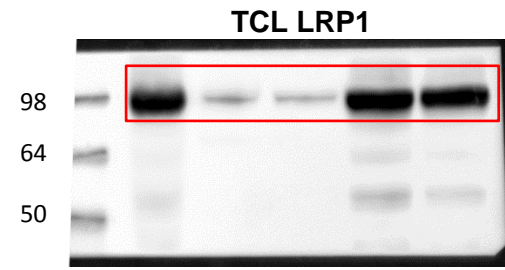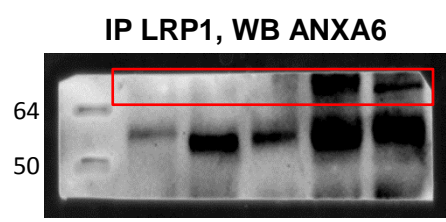

Membrane cut at 98kDa – shared with ANXA6

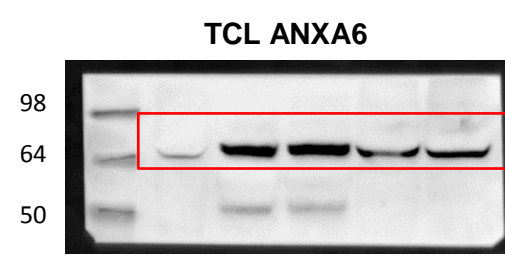

**Full unedited gel for Figure 2D**

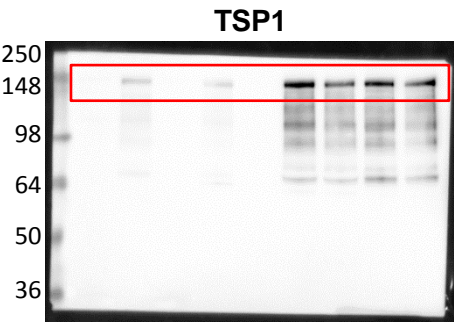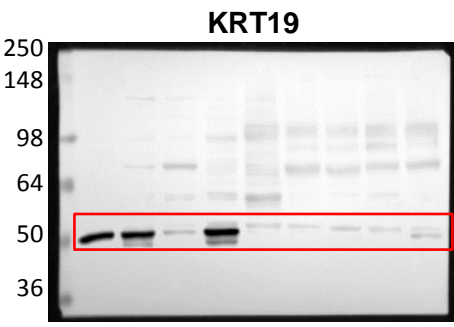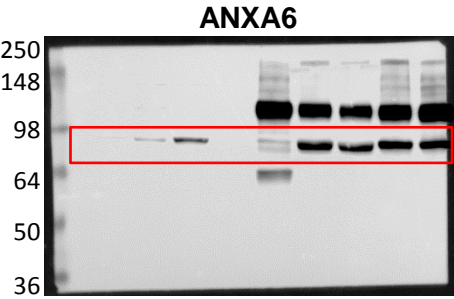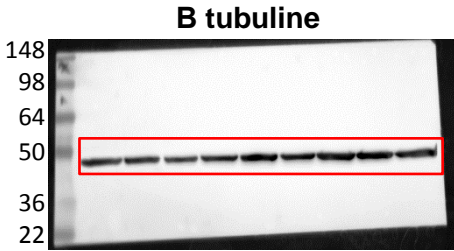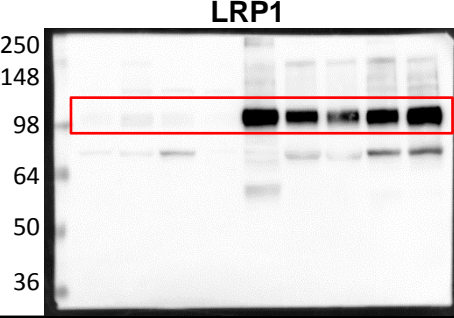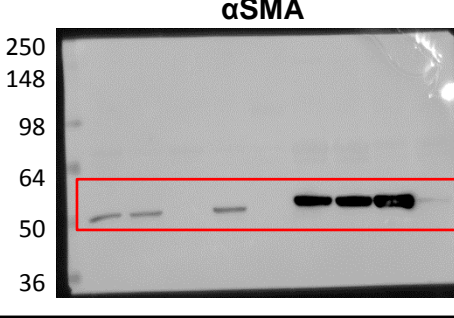



### Full unedited gel for Figure 2F

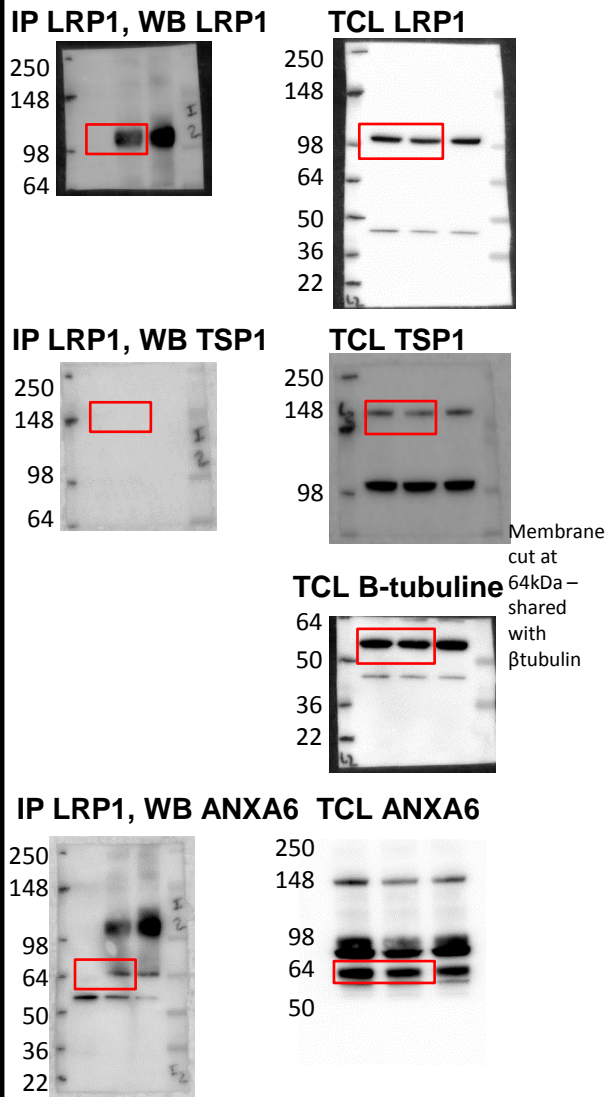

### Full unedited gel for Figure 2H

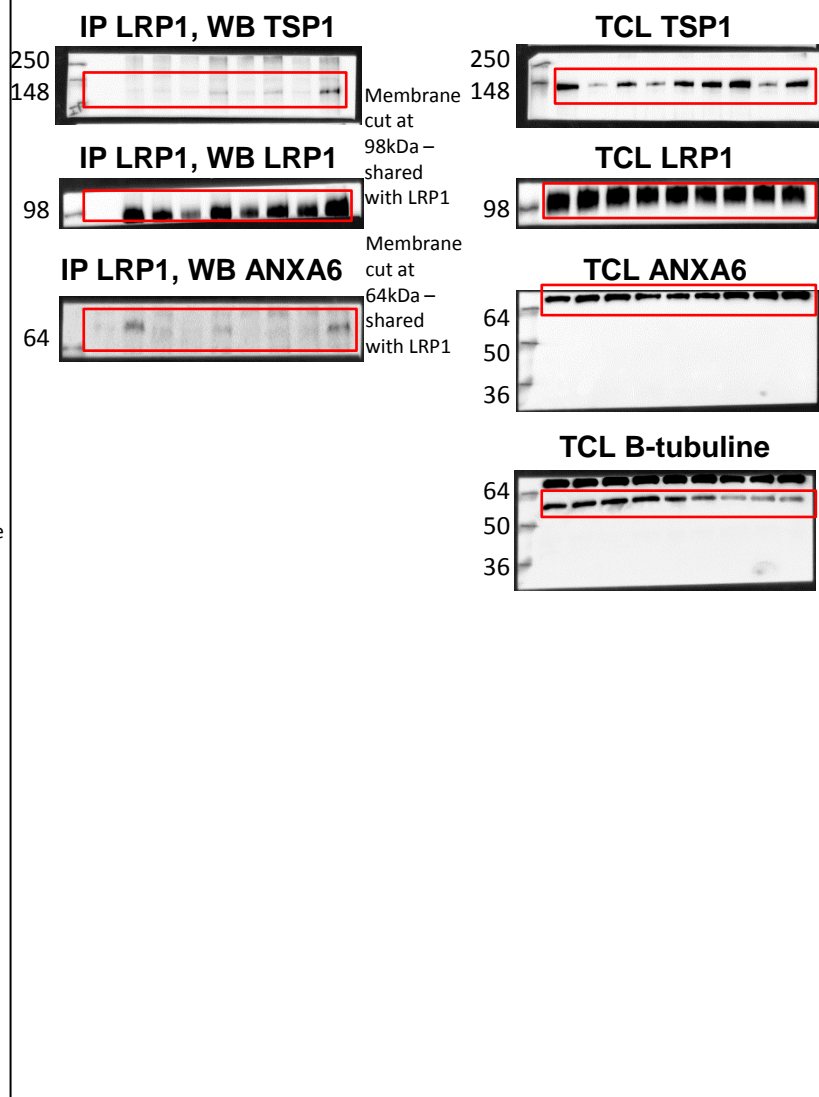

### Full unedited gel for Figure 3D

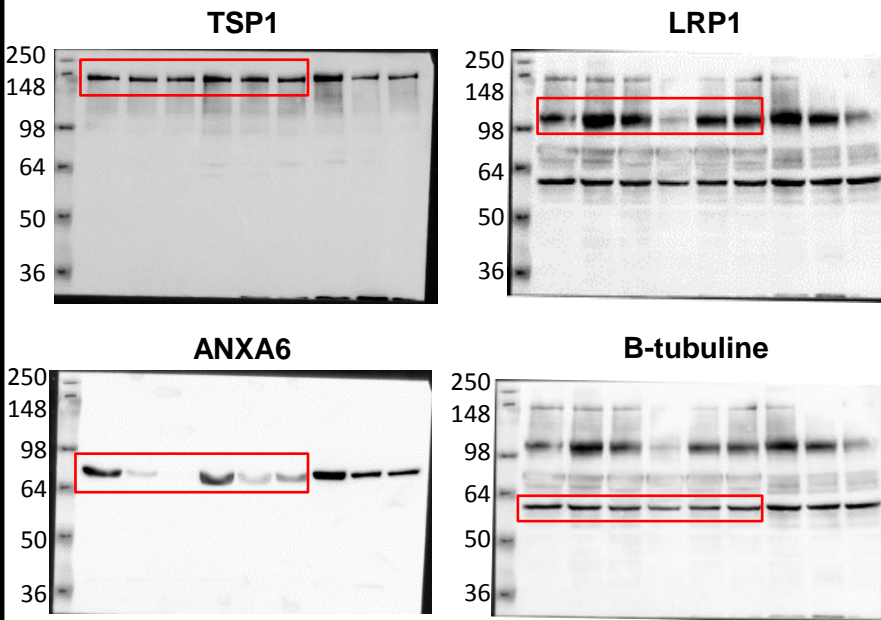

### Full unedited gel for Figure 3E

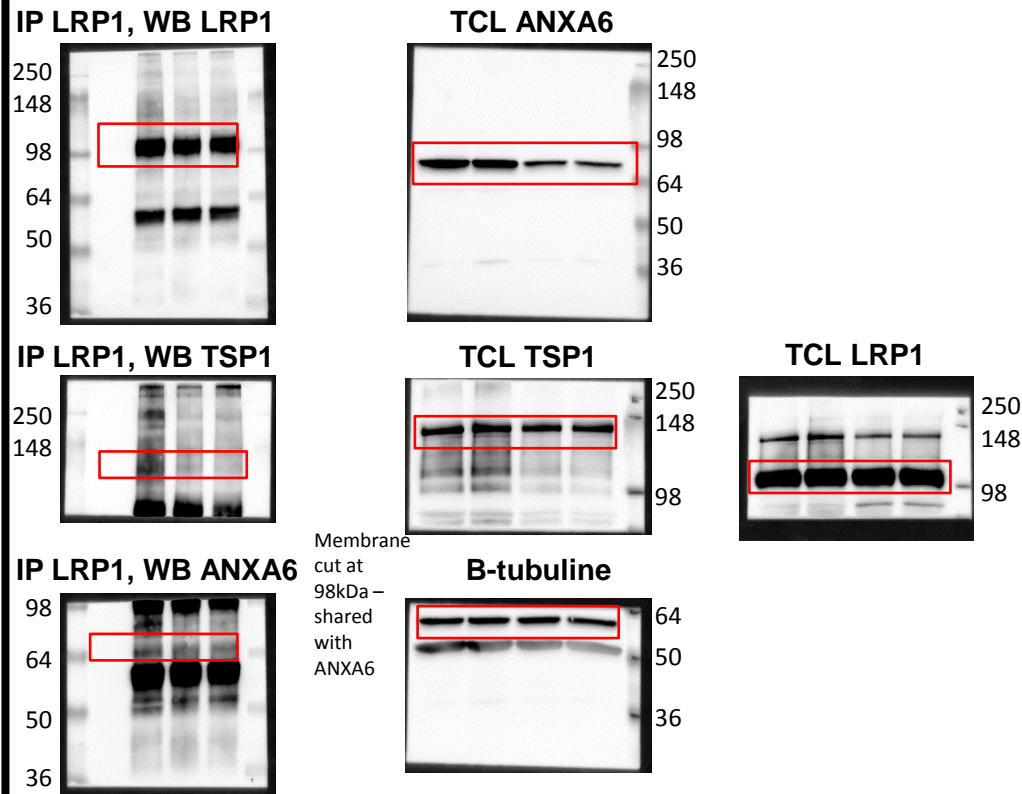

### Full unedited gel for Figure 4C

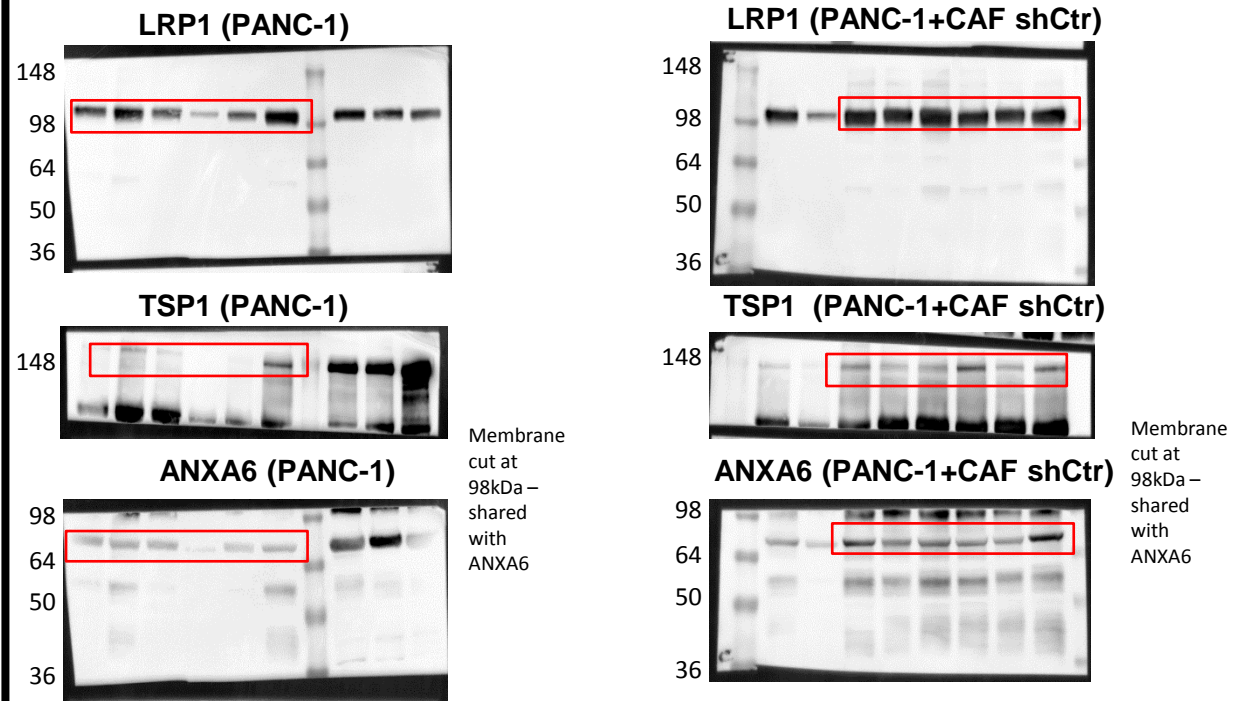

**LRP1 (PANC-1+ CAF shANXA6-1)****LRP1 (PANC-1+CAF shANXA6-2)**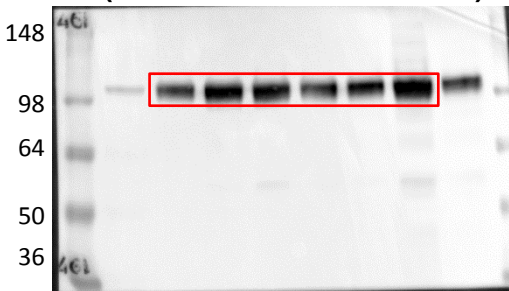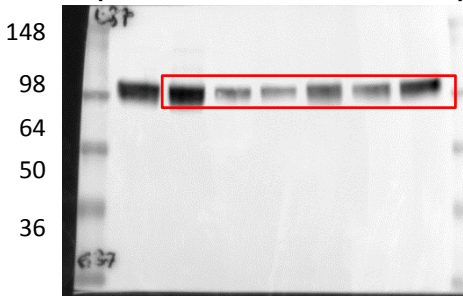**TSP1 (PANC-1+ CAF shANXA6-1)****TSP1 (PANC-1+CAF shANXA6-2)**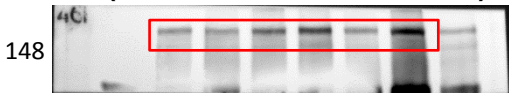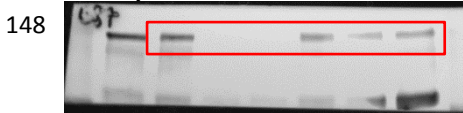

Membrane  
cut at  
98kDa –  
shared  
with  
ANXA6

Membrane  
cut at  
98kDa –  
shared  
with  
ANXA6

**ANXA6 (PANC-1+ CAF shANXA6-1)****ANXA6 (PANC-1+CAF shANXA6-2)**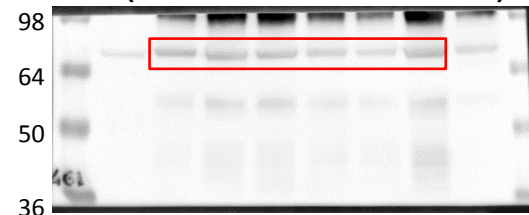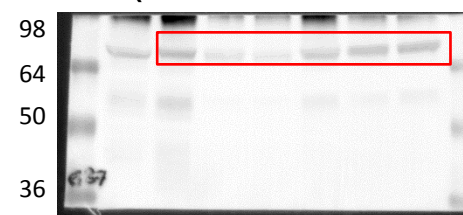**Full unedited gel for Figure 5A****ANXA6 - TCL****Syntenin - TCL****TSG-101 - TCL****LRP1 - TCL**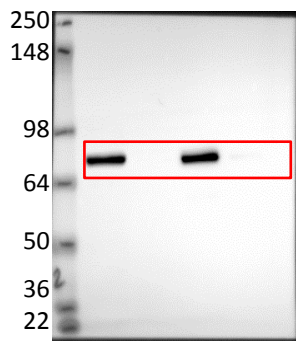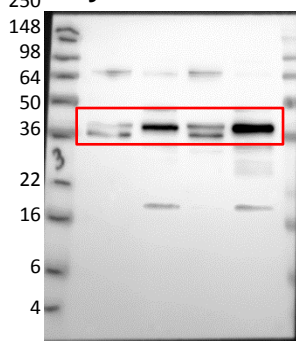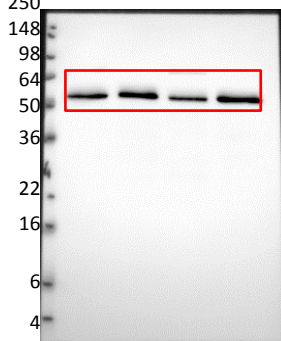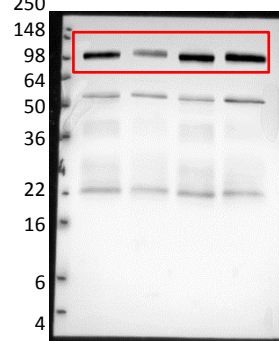**B1 integrin - TCL****TSP1 - TCL****ALIX - TCL**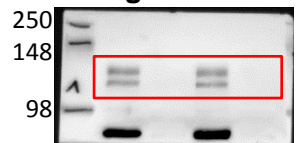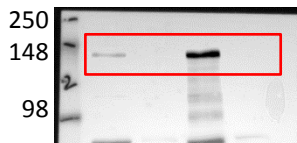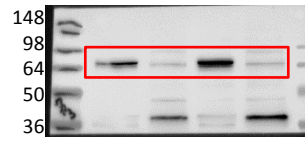

Membrane  
cut at  
98kDa –  
shared  
with  
VDAC1

Membrane  
cut at  
98kDa –  
shared  
with  
calnexin

**VDAC1 - TCL****calnexin - TCL****GFP - TCL**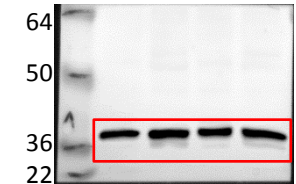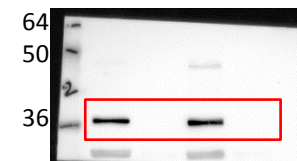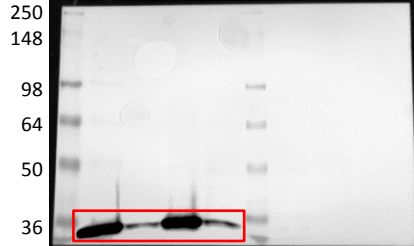**B tubulin - TCL**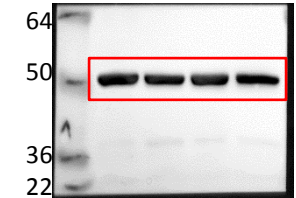



**ANXA6 - HSP****Syntenin - HSP****TSG-101 - HSP****LRP1 - HSP**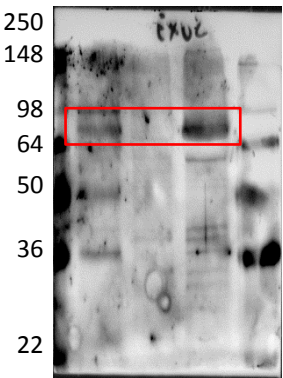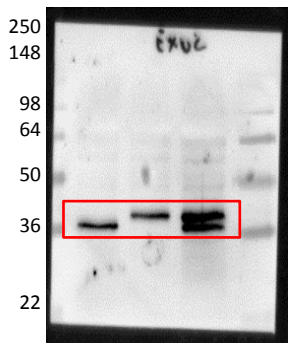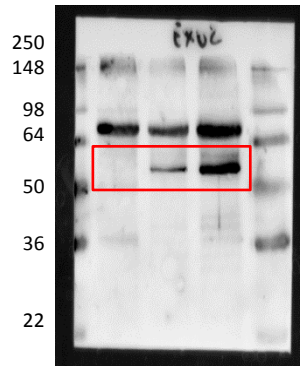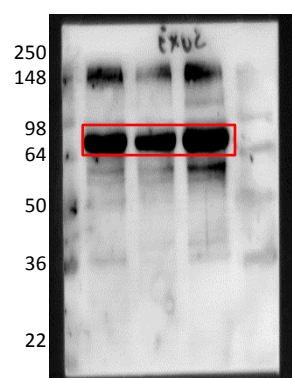**B1 integrin - HSP****TSP1 - HSP****ALIX - HSP**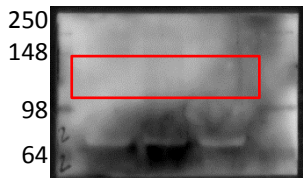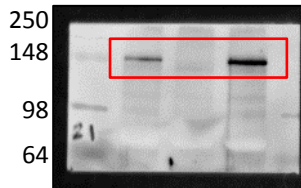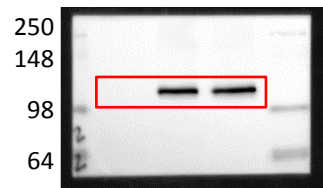

Membrane  
cut at  
64kDa -  
shared  
with  
VDAC1

Membrane  
cut at  
64kDa -  
shared  
with  
GFP

**Calnexin - HSP****VDAC1 - HSP****GFP - HSP**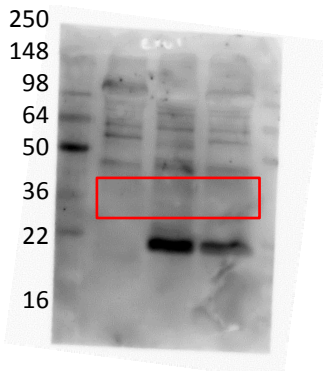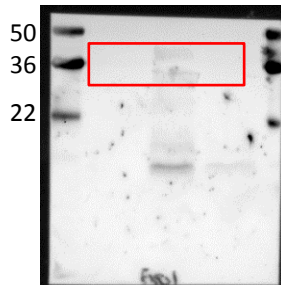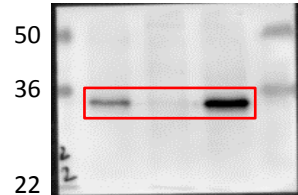**Full unedited gel for Figure 5B****IP LRP1, WB ANXA6**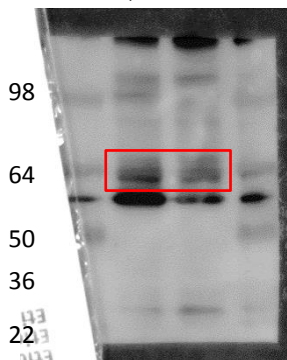**IP LRP1, WB LRP1**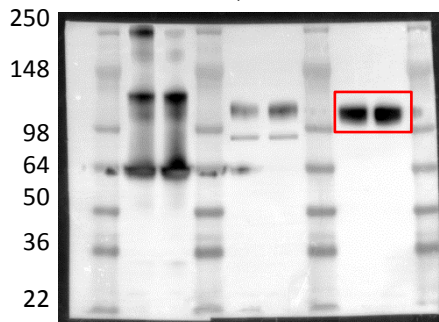**IP LRP1, WB TSP1**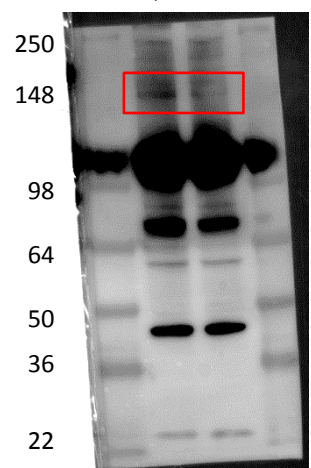

HSP, WB ANXA6

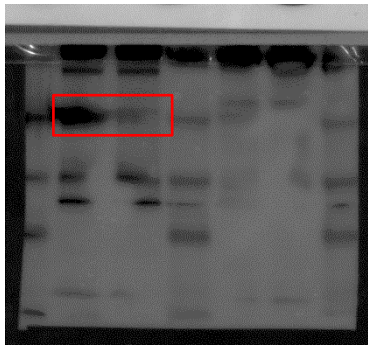

HSP, WB LRP1

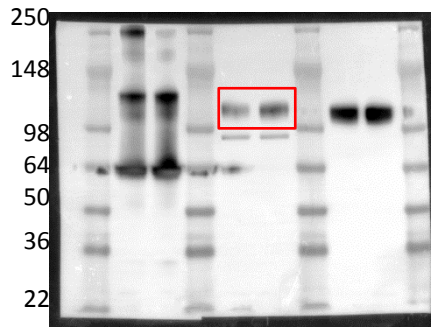

HSP, WB TSP1

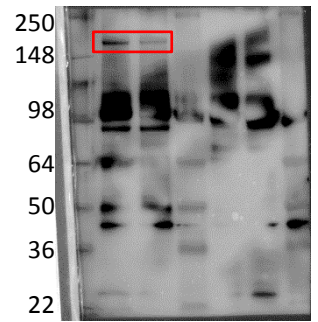

Full unedited gel for Figure 6A

ANXA6

Healthy  
(n=7)

PDA  
(n=2)

Healthy  
(Ctr-)

PDA (n=8)

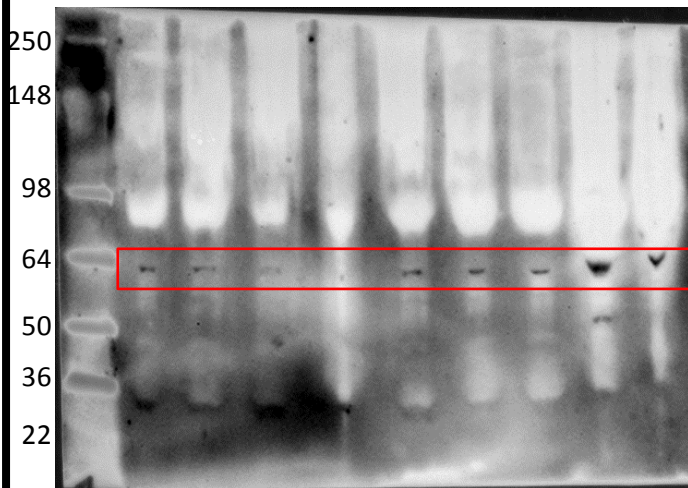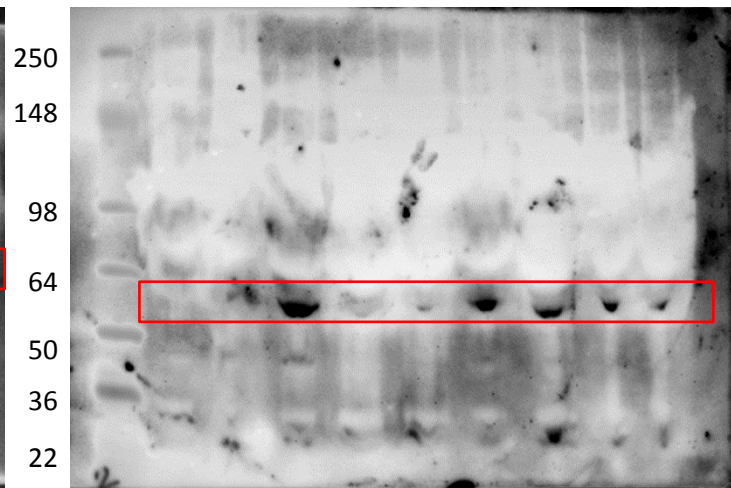

Healthy  
(Ctr-)

PDA (n=8)

Healthy  
(Ctr-)

PDA (n=8)

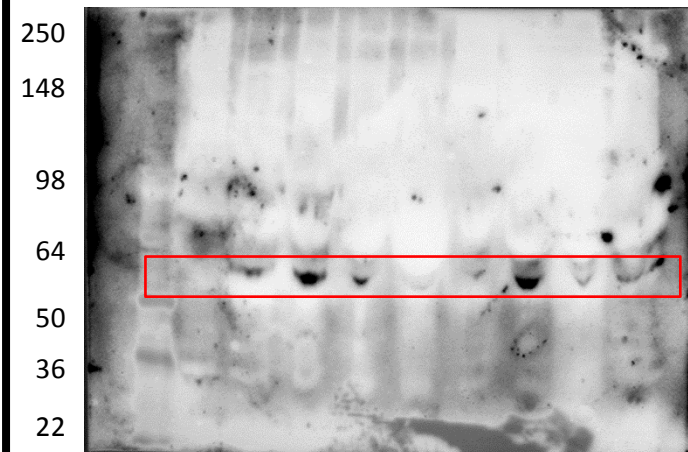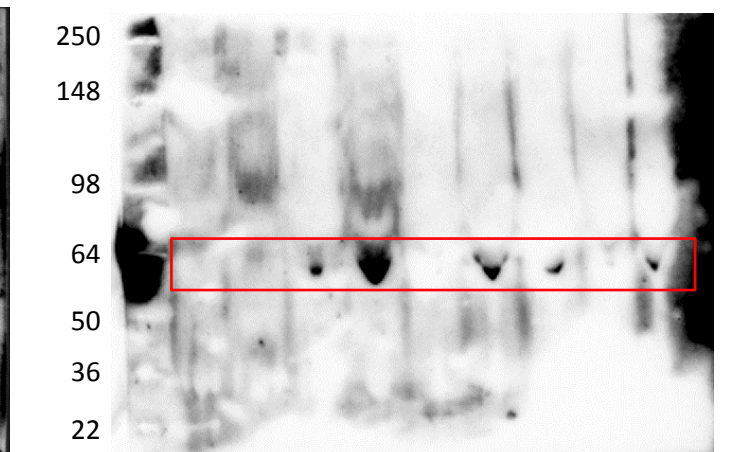



# ANXA6

Healthy  
(Ctr-)

PDA (n=8)

Healthy  
(Ctr-)

PDA (n=8)

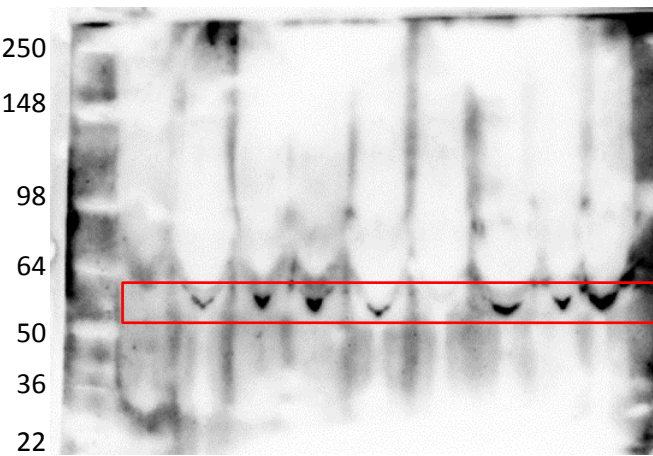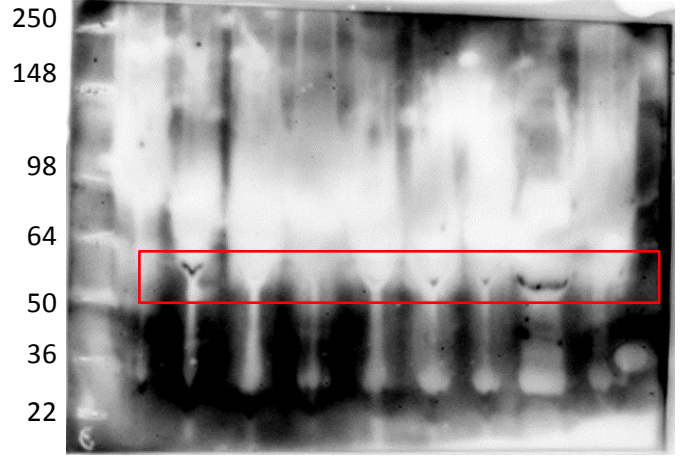

Healthy  
(Ctr-)

PDA (n=8)

Healthy  
(Ctr-)

PDA (n=8)

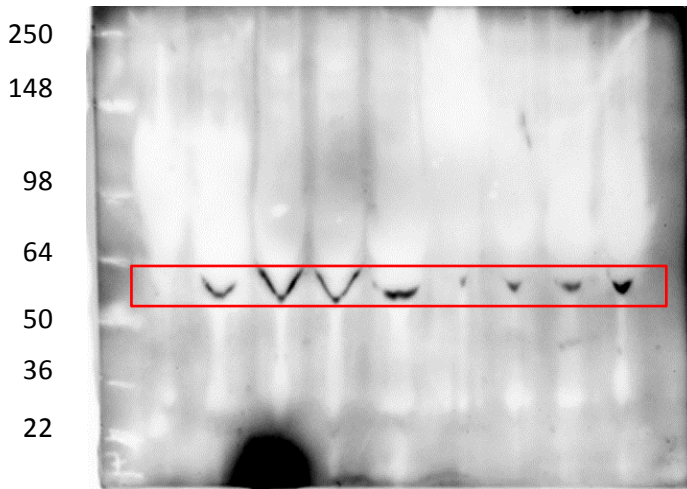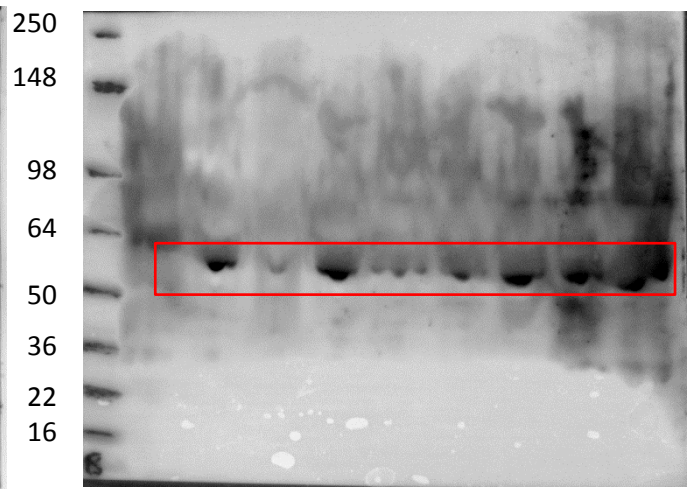

Healthy  
(Ctr-)

PDA (n=8)

Healthy  
(Ctr-)

PDA (n=8)

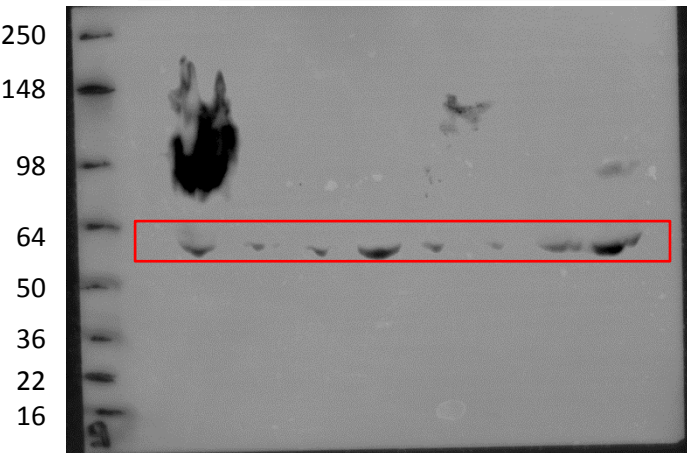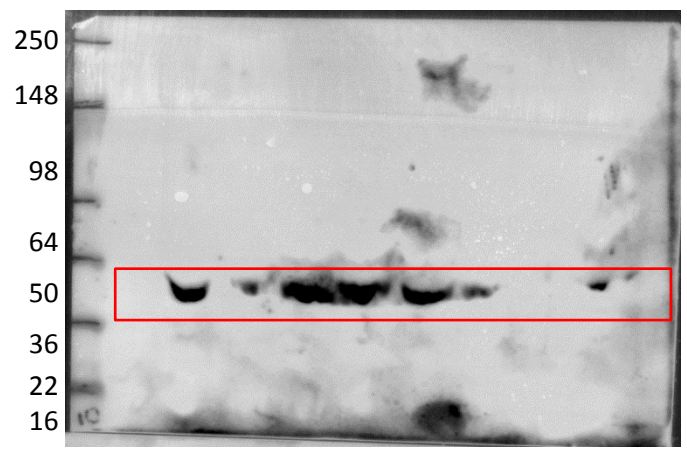



# ANXA6

Healthy  
(Ctr-)

PDA n=8)

Healthy  
(Ctr-)

PDA  
(n=8)

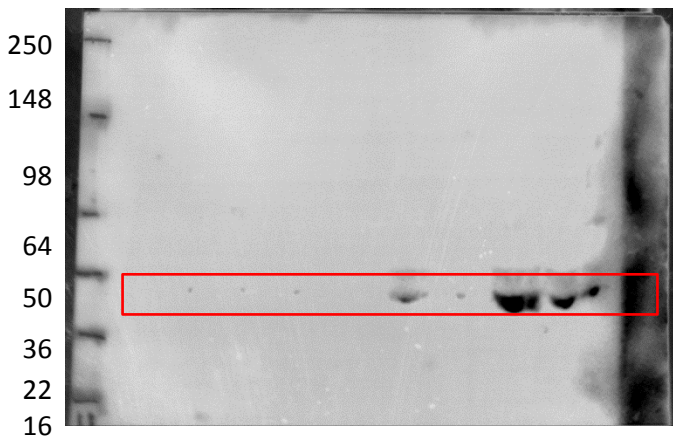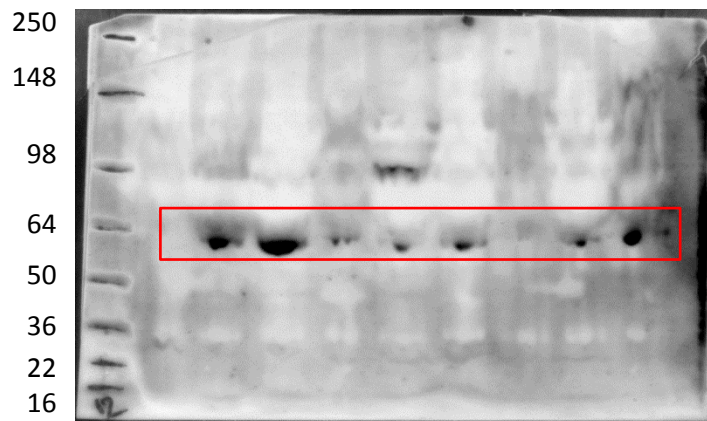

Healthy  
(Ctr-)

PDA (n=8)

Healthy  
(Ctr-)

PDA (n=8)

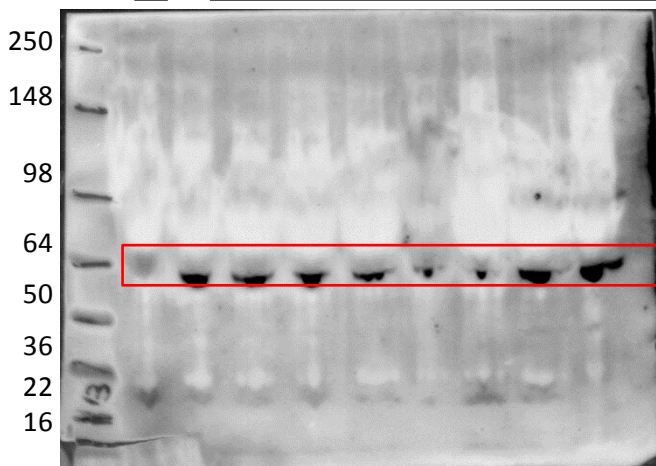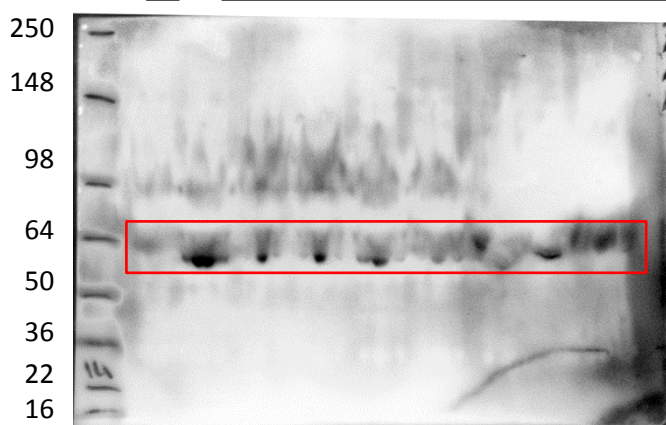

Healthy  
(Ctr-)

PDA  
(n=2)

PDA (Ctr+)  
Healthy (Ctr-)

Benign  
(n=3)

Others cancers  
(n=4)

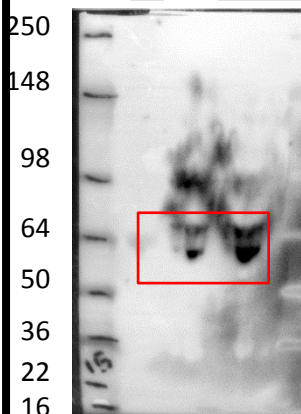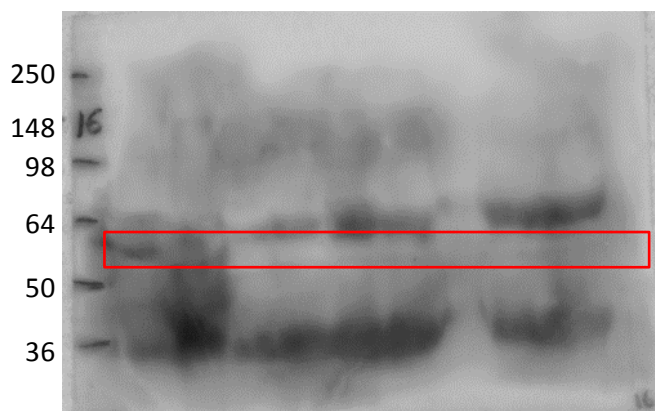

# ANXA6

**PDA  
(Ctr+)**

**Benign (n=8)**

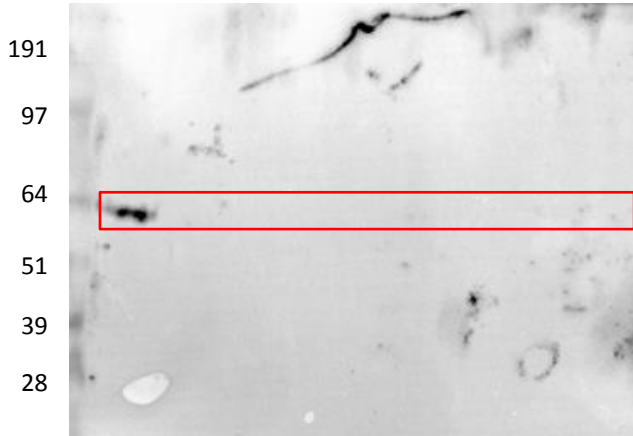

**Others  
PDA cancers  
(Ctr+) (n=2)**

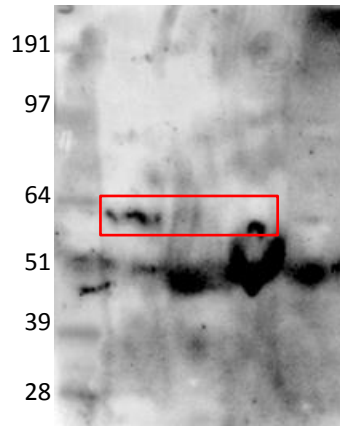

**PDA (Ctr+)**  
**Others cancers (n=1)**  
**Benign (n=1)**

**Others cancers (n=3)**  
**Benign (n=2)**

**Others cancers (n=1)**

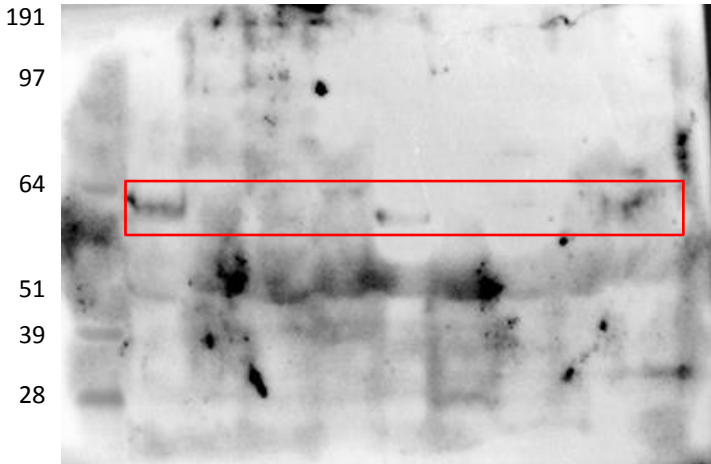

**PDA (Ctr+)**

**Healthy (n=8)**

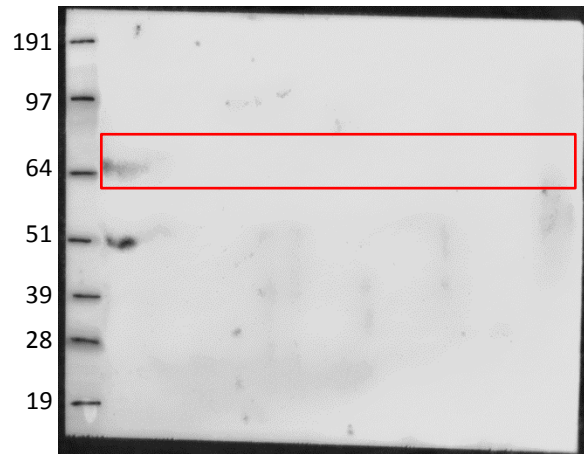

**Healthy (n=8)**

**PDA (Ctr+)**

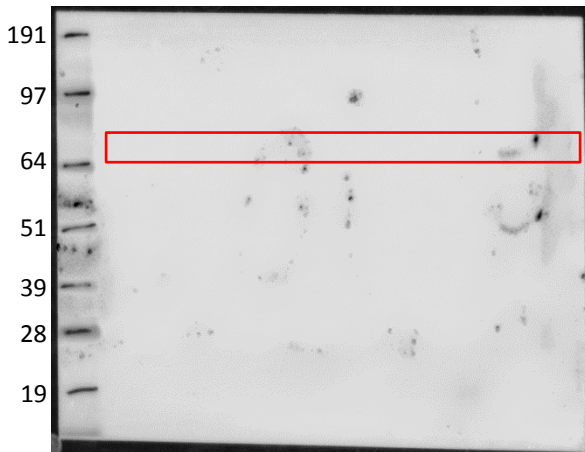

**PDA (Ctr+)**

**Healthy (n=7)**

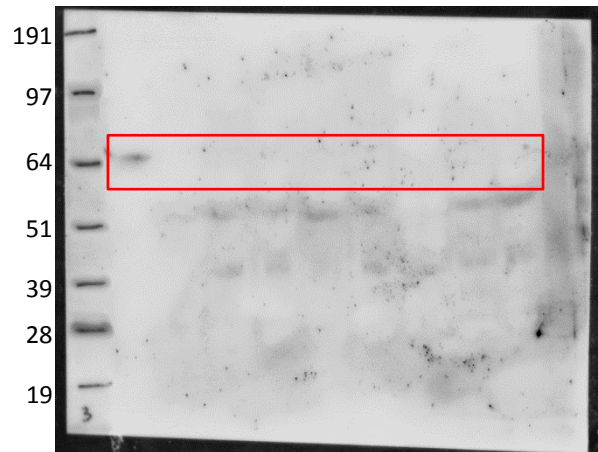

**Full unedited gel for Supplemental Figure S1 D**

**IP ANXA6, WB TSP1**

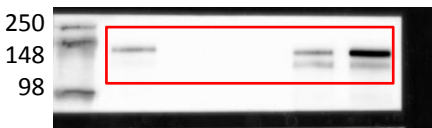

**IP ANXA6, WB ANXA6**

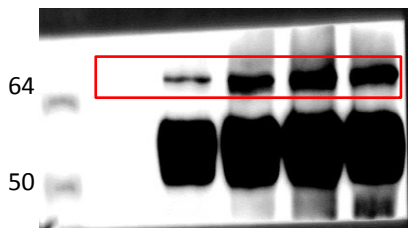

**IP ANXA6, WB LRP1**

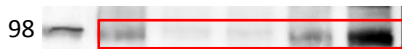

Membrane  
cut at  
98kDa –  
shared  
with  
ANXA6

**TCL - WB LRP1**

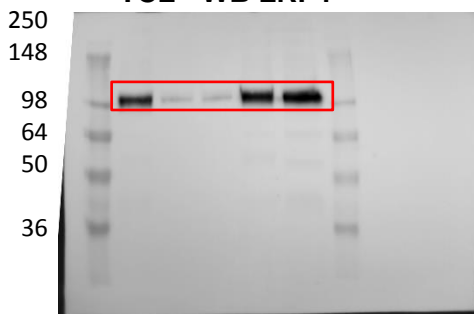

**TCL - WB TSP1**

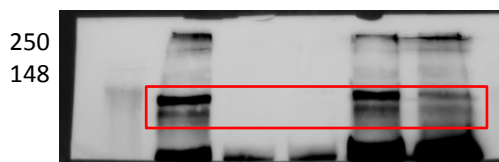

Membrane  
cut at  
148kDa –  
shared  
with  
ANXA6

**TCL - WB ANXA6**

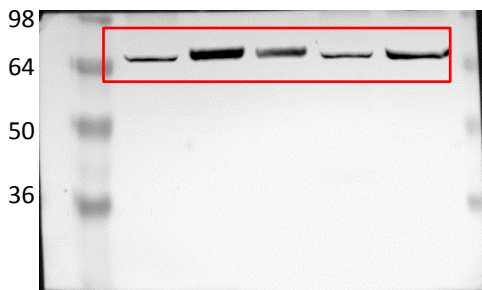



**Full unedited gel for Supplemental Figure S4A**

**IP ANXA6, WB TSP1**

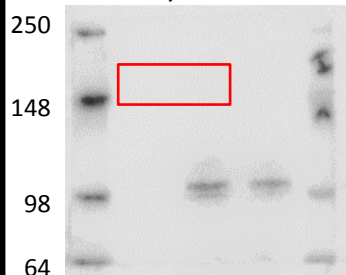

**TCL - WB TSP1**

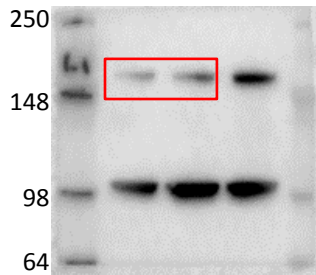

**IP ANXA6, WB LRP1**

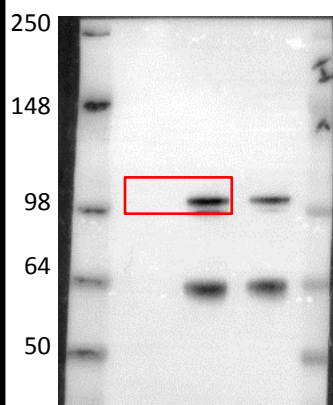

**TCL - WB LRP1**

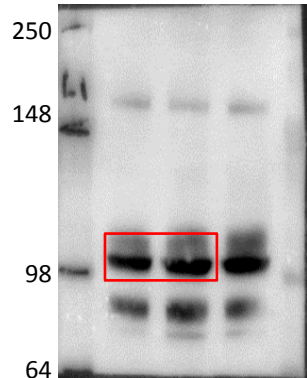

**IP ANXA6, WB ANXA6**

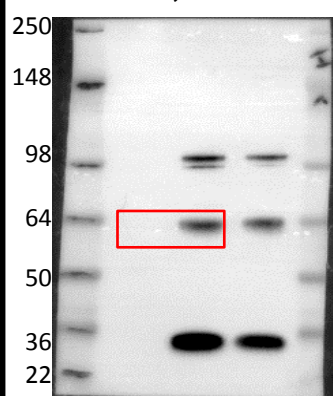

**TCL - WB ANXA6**

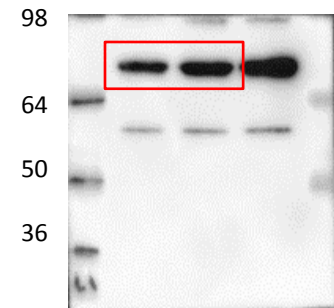

**TCL - B-tubulin**

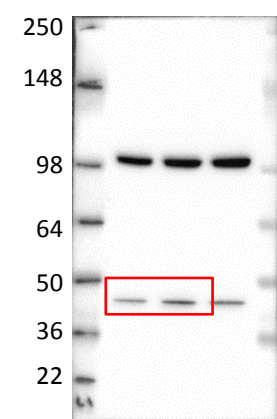

**Full unedited gel for Supplemental Figure S4F**

**FAP**

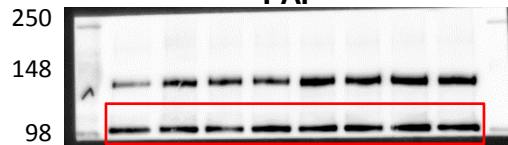

**PDGFRB**

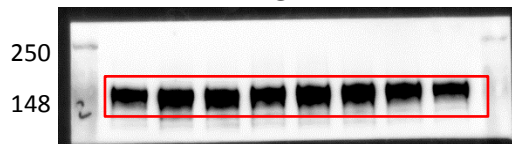

**aSMA**

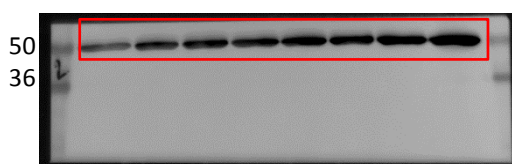

**B-tubulin**

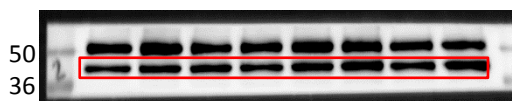

**Full unedited gel for Supplemental Figure S4G**

**TSP1**

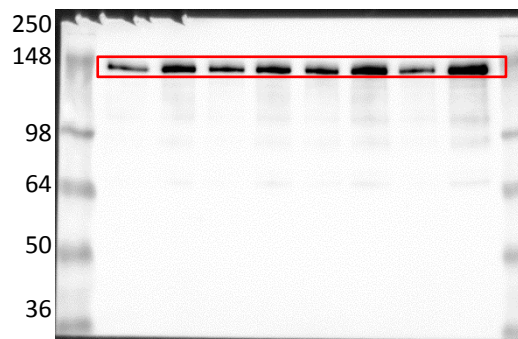

**LRP1**

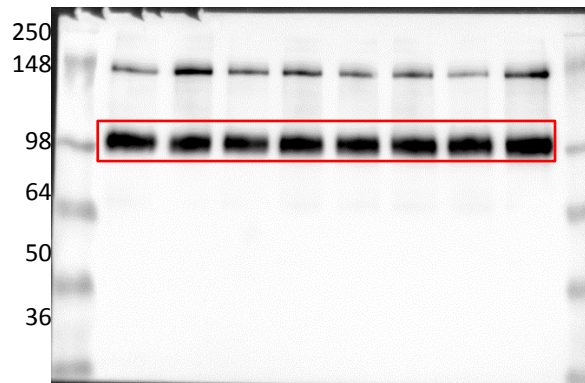

**ANXA6**

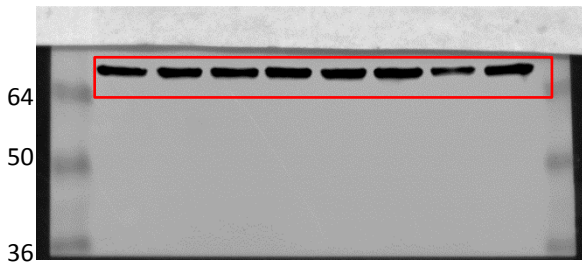

**B-tubulin**

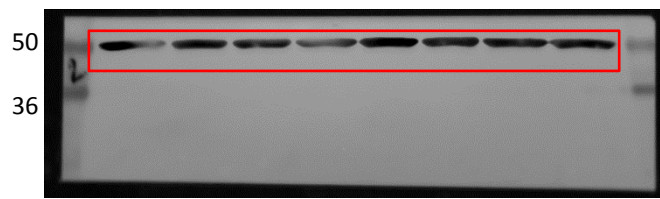

**Full unedited gel for Supplemental Figure S4H**

**IP LRP1, WB TSP1**

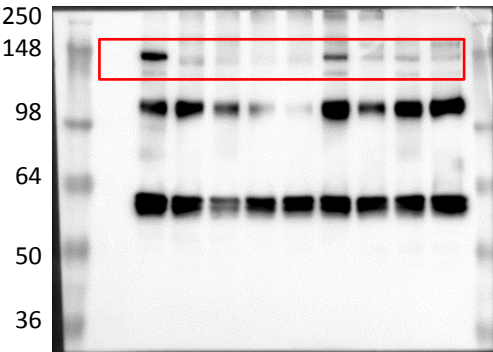

**TCL - TSP1**

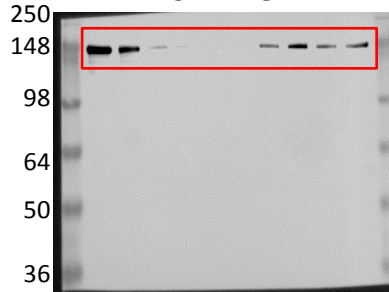

**IP LRP1, WB ANXA6**

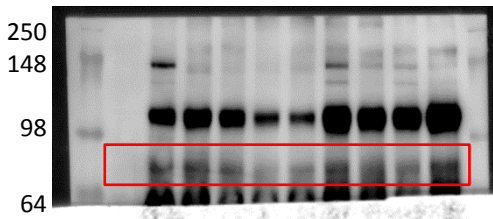

**TCL - ANXA6**

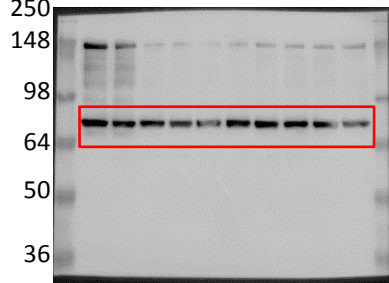

**IP LRP1, WB LRP1**

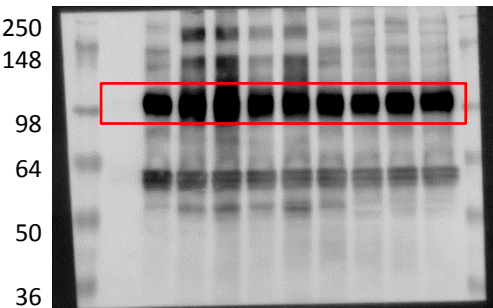

**TCL - LRP1**

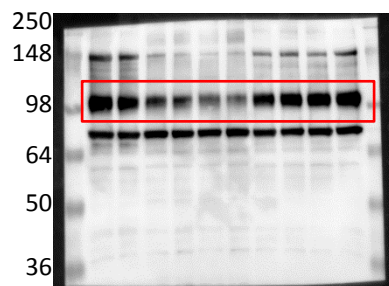

**TCL - B-tubulin**

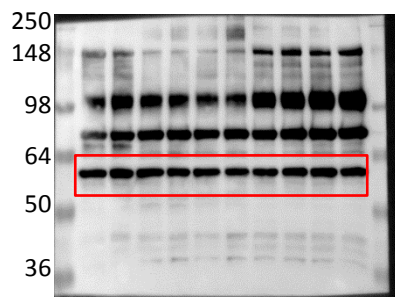

### Full unedited gel for Supplemental Figure S5B

Snail

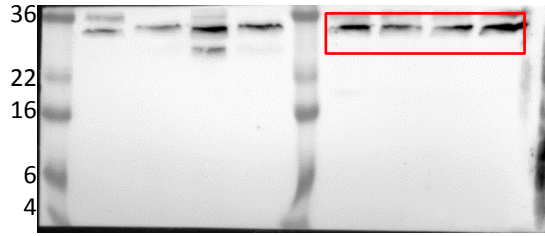

Membrane cut at 50kDa – shared with B-tubulin

B-tubulin

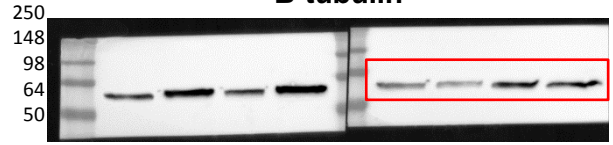

Caspase -3

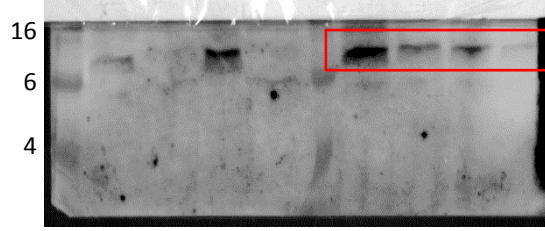

### Full unedited gel for Supplemental Figure S6C

ANXA6

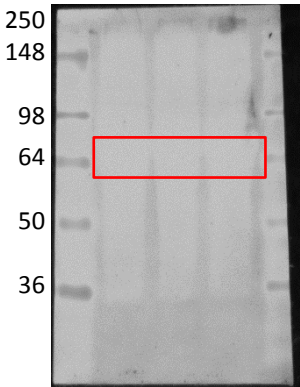

LRP1

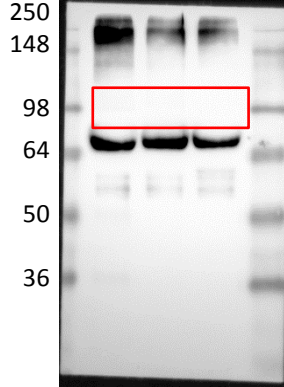

TSP1

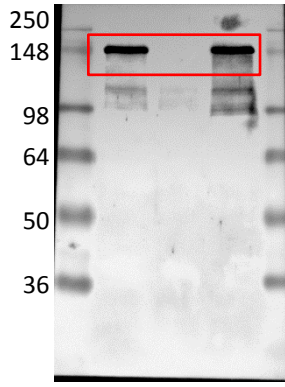

GFP

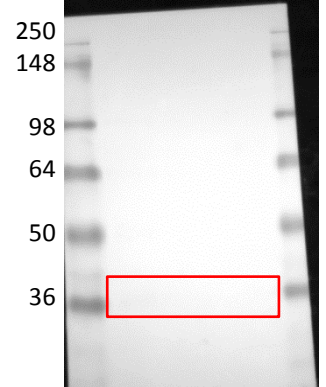

### Full unedited gel for Supplemental Figure S6D

HSP, ANXA6

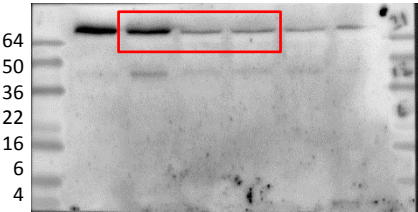

TCL, ANXA6

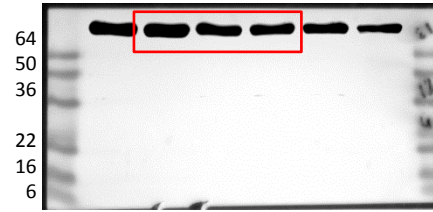

HSP, LRP1

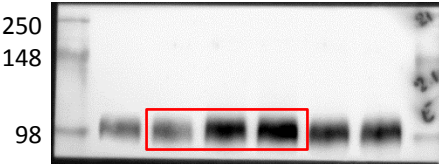

TCL, LRP1

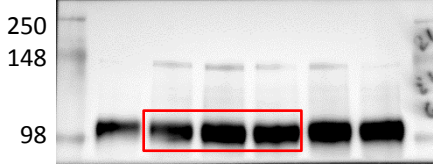

HSP, ALIX

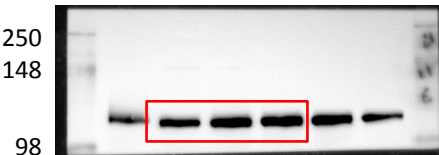

TCL, ALIX

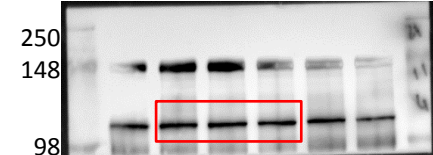



**HSP, TSG101**

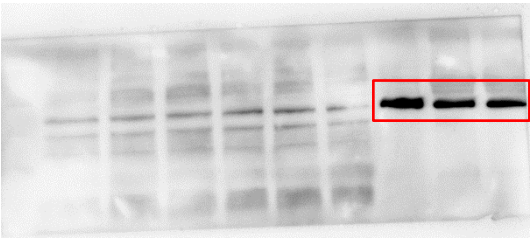

**TCL, TSG101**

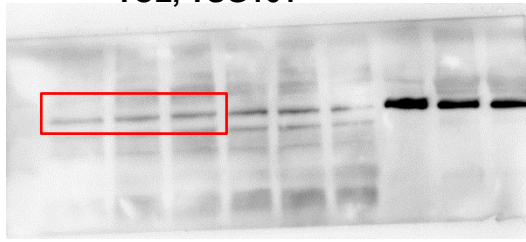

**HSP, TSP1**

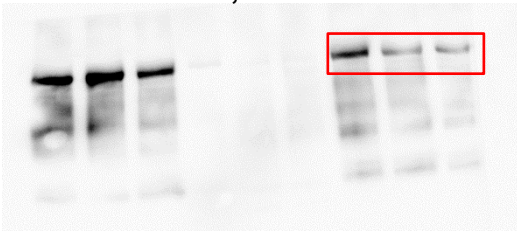

**TCL, TSP1**

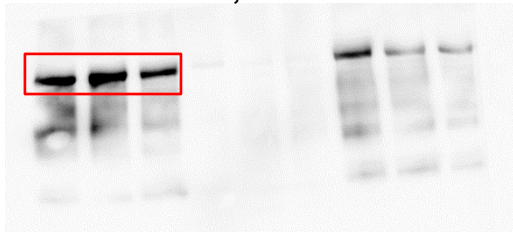

**HSP, syntenin**

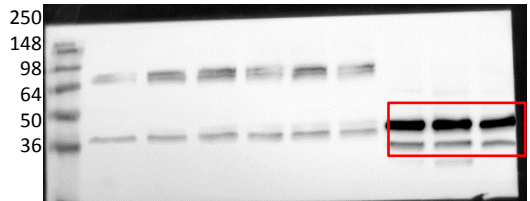

**TCL, syntenin**

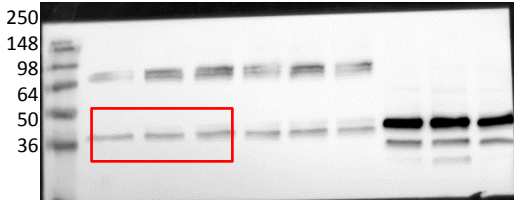

**HSP, calnexin**

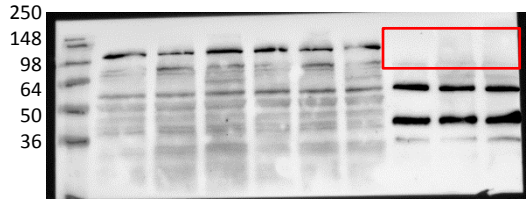

**TCL, calnexin**

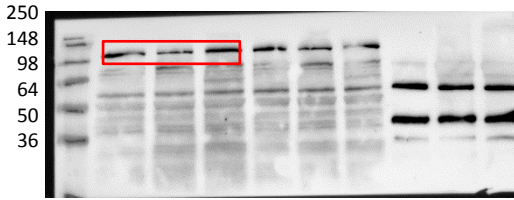

**TCL, B tubulin**

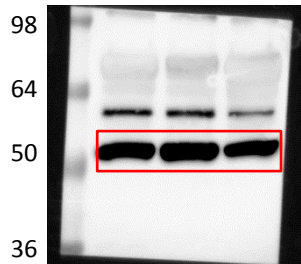

Full unedited gel for Supplemental Figure S7A

ANXA6

Healthy (n=5)

PDA (n=1)  
Healthy (n=1)

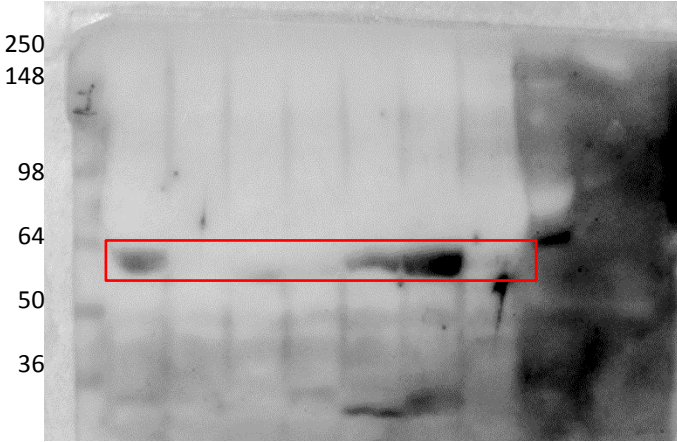

PDA (n=2)

Healthy (n=1)

PDA (n=4)

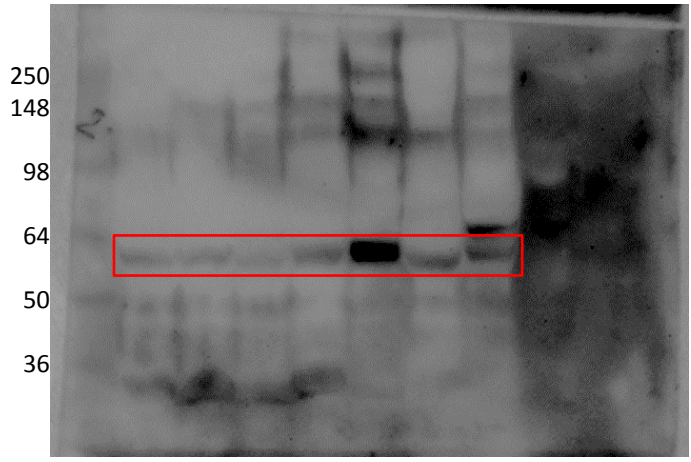

Supplement: jci-126-87734-s001.pdf [file jci-126-87734-s001.pdf]
